# Supplementary material for: Hexafluorophosphate additive enables durable seawater oxidation at ampere-level current density
Source: Springer Nature journal article supplement (doi:10.1038/s41467-025-60413-0), 2025-05-29
Supplement: MOESM1 [file 41467_2025_60413_MOESM1_ESM.pdf]

## Supplementary Information

### Hexafluorophosphate additive enables durable seawater oxidation at ampere-level current density

Xun He<sup>1,2,3,#</sup>, Yongchao Yao<sup>1,4,#</sup>, Limei Zhang<sup>2,4</sup>, Hefeng Wang<sup>3</sup>, Hong Tang<sup>2</sup>, Wenlong Jiang<sup>2</sup>, Yuchun Ren<sup>2</sup>, Jue Nan<sup>2</sup>, Yongsong Luo<sup>1</sup>, Tongwei Wu<sup>2\*</sup>, Fengming Luo<sup>1\*</sup>, Bo Tang<sup>3,5\*</sup> & Xuping Sun<sup>1,3\*</sup>

<sup>1</sup>Center for High Altitude Medicine, West China Hospital, Sichuan University, Chengdu 610041, Sichuan, China. <sup>2</sup>Institute of Fundamental and Frontier Sciences, University of Electronic Science and Technology of China, Chengdu 610054, Sichuan, China. <sup>3</sup>College of Chemistry, Chemical Engineering and Materials Science, Shandong Normal University, Jinan 250014, Shandong, China. <sup>4</sup>Department of Laboratory Medicine/Clinical Laboratory Medicine Research Center, West China Hospital, Sichuan University, Chengdu 610041, Sichuan, China. <sup>5</sup>Laoshan Laboratory, Qingdao 266237, Shandong, China. <sup>#</sup>Both authors contributed equally to this work.

\*Correspondence and requests for materials should be addressed to T.W. (email: [twu77@uestc.edu.cn](mailto:twu77@uestc.edu.cn)) or F.L. (email: [luofengming@wchscu.edu.cn](mailto:luofengming@wchscu.edu.cn)) or B.T. (email: [tangb@sdnu.edu.cn](mailto:tangb@sdnu.edu.cn)) or X.S. (email: [xpsun@uestc.edu.cn](mailto:xpsun@uestc.edu.cn)).

### Supplementary Note 1: Chloride corrosion mechanism on electrode materials.

Chloride corrosion occurs in a sequence of three main steps: polarization, dissolution, and hydrolysis.

#### 1. Adsorption of $\text{Cl}^-$ through surface polarization.

The process begins with the adsorption of  $\text{Cl}^-$  onto the electrode surface, leading to the following reaction:

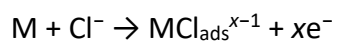

#### 2. Dissolution through further coordination.

Following adsorption, the chloride complex undergoes further coordination, where the adsorbed chloride interacts with additional  $\text{Cl}^-$ , leading to dissolution of the metal:

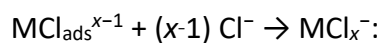

#### 3. Conversion from chloride to hydroxide.

Finally, the chloride species reacts with  $\text{OH}^-$  in an aqueous environment, leading to the conversion of the metal chloride to metal hydroxide:

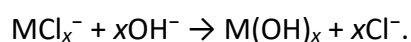

**Supplementary Note 2: Estimation of the energy consumption and hydrogen production cost of the NiFe LDH/NF||Pt/C/NF flow-type electrolyzer.**

The NiFe LDH/NF||Pt/C/NF flow-type electrolyzer operated under a dual-feed configuration using 6 M KOH + seawater as both the anolyte and catholyte, with  $\text{PF}_6^-$  introduced into the anolyte. The energy consumption was evaluated under electrolysis conditions of  $1.0 \text{ A cm}^{-2}$ ,  $2.02 \text{ V}$ ,  $60^\circ\text{C}$ , and an electrode area of  $1 \times 1 \text{ cm}^2$ . Under these conditions, the power input was calculated to be  $2.02 \text{ W cm}^{-2}$ . The hydrogen production rate was determined to be  $5.18 \times 10^{-6} \text{ mol cm}^{-2} \text{ s}^{-1}$ . Taking the lower heating value (LHV) of  $\text{H}_2$  as  $120 \text{ MJ kg}^{-1}$  (equivalent to  $241.9 \text{ kJ mol}^{-1}$ ), the output power density associated with  $\text{H}_2$  generation was estimated to be  $1.253 \text{ W cm}^{-2}$ . Accordingly, the energy efficiency (based on LHV) was calculated to be 62.0%. The electricity consumption per kilogram of hydrogen was further estimated as  $53.7 \text{ kWh kg}^{-1} \text{ H}_2$  ( $4.49 \text{ kWh m}^{-3}$ ), corresponding to a production cost of  $\text{US\$}1.07 \text{ kg}^{-1} \text{ H}_2$ , when utilizing offshore renewable electricity at  $\text{US\$}0.02 \text{ kWh}^{-1}$ .

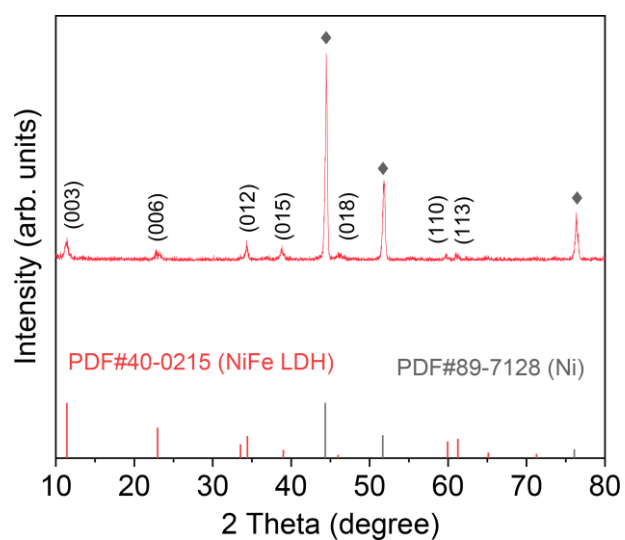

**Supplementary Fig. 1 | XRD pattern.** XRD pattern of NiFe LDH/NF. Source data are provided as a Source Data file.

XRD pattern analysis verifies the NiFe LDH on Ni, with diffraction peaks matching the lattice planes of NiFe LDH (JCPDS#40-0215) and metallic Ni (JCPDS#89-7128).

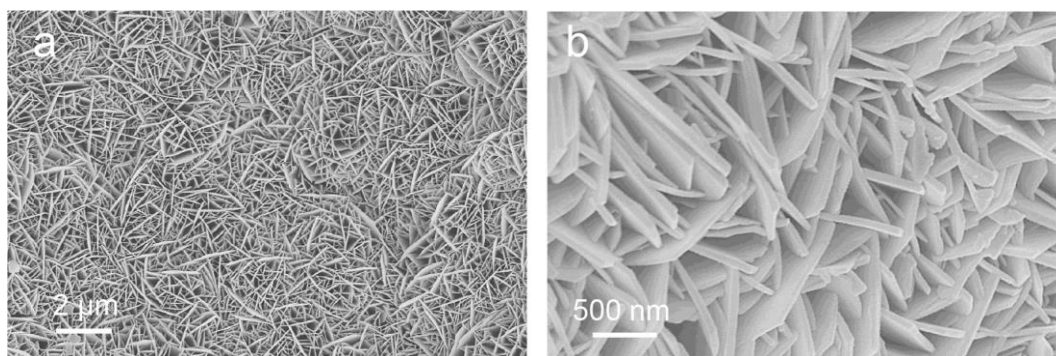

**Supplementary Fig. 2 | SEM images. (a)** Low- and **(b)** high-magnification SEM images of NiFe LDH/NF.

SEM analysis displays the 2D nanosheet array structure of the prepared NiFe LDH. Such structures have been extensively reported to possess strong hydrophilicity, thus promoting efficient mass transfer of O<sub>2</sub> during electrolysis and offering a certain degree of mechanical buffering against external forces (*Adv. Mater.* **36**, 2311322 (2024); *Acc. Chem. Res.* **51**, 1590 (2019); *Adv. Mater.* **27**, 2361 (2015); *Nat. Commun.* **15**, 4712 (2024); *ACS Catal.* **11**, 13140 (2021)).

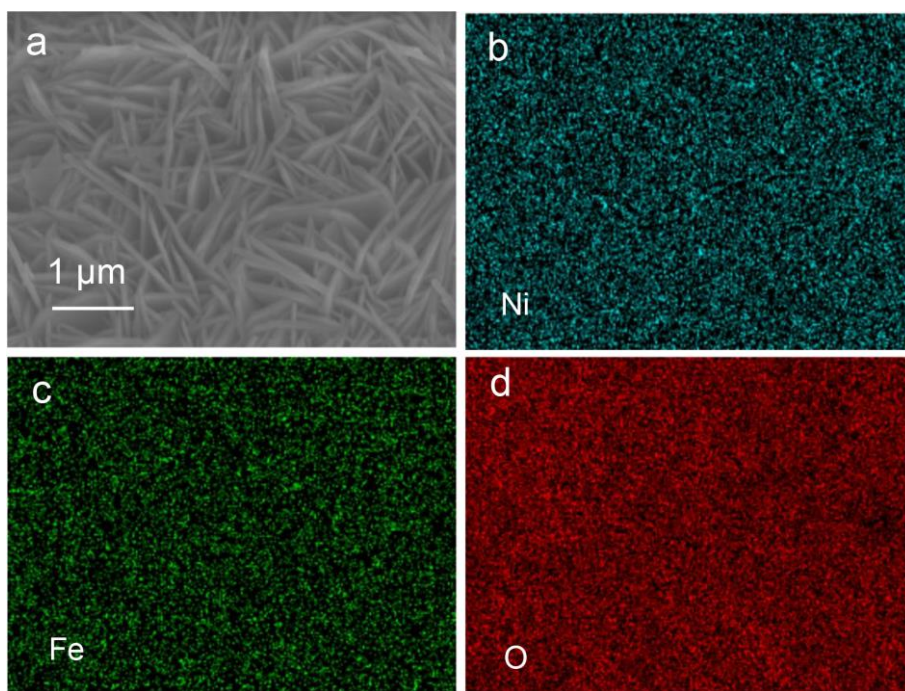

**Supplementary Fig. 3 | Elemental distributions. (a)** SEM image and its corresponding energy-dispersive X-ray spectroscopy (EDS) images **(b–d)** of NiFe LDH/NF.

SEM and EDS analyses reveal the uniform distribution of Ni, Fe, and O on NiFe LDH/NF.

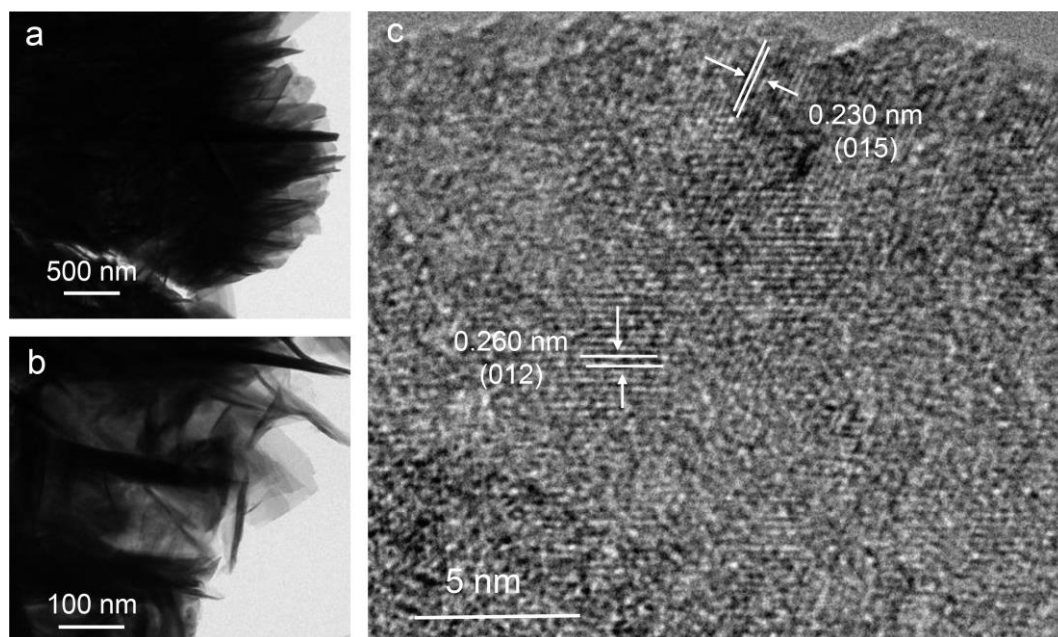

**Supplementary Fig. 4 | TEM images and HRTEM image. (a)** Low- and **(b)** high-magnification TEM images of NiFe LDH. **(c)** HRTEM image of NiFe LDH.

As depicted in Supplementary Fig. 4a, b, the sample further demonstrates the characteristic 2D nanosheet structure of LDH. HRTEM analysis (Supplementary Fig. 4c) confirms lattice spacings of 0.230 nm and 0.260 nm, corresponding to the (015) and (012) crystallographic planes of NiFe LDH, respectively.

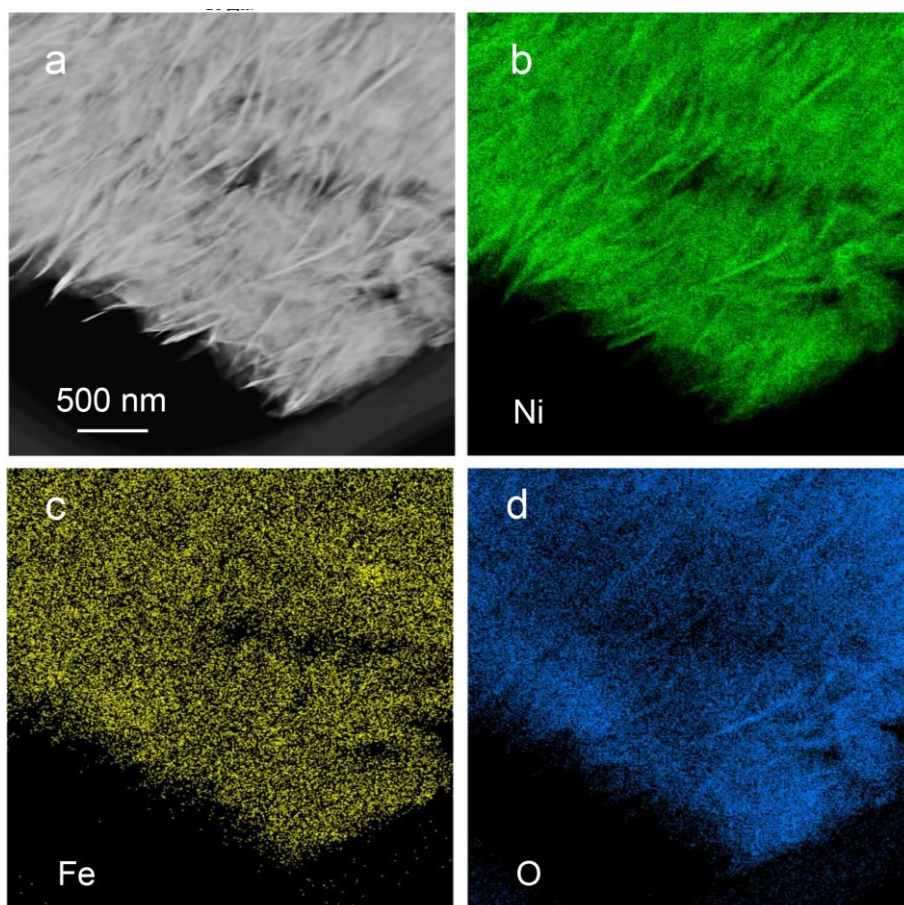

**Supplementary Fig. 5 | Elemental distributions.** (a) High-angle annular dark field scanning transmission electron microscopy (HAADF-STEM) image and (b-d) its corresponding EDS elemental mapping images of NiFe LDH.

The use of HAADF-STEM and EDS elemental mapping confirms that Ni, Fe, and O elements are uniformly dispersed throughout the 2D LDH nanosheets.



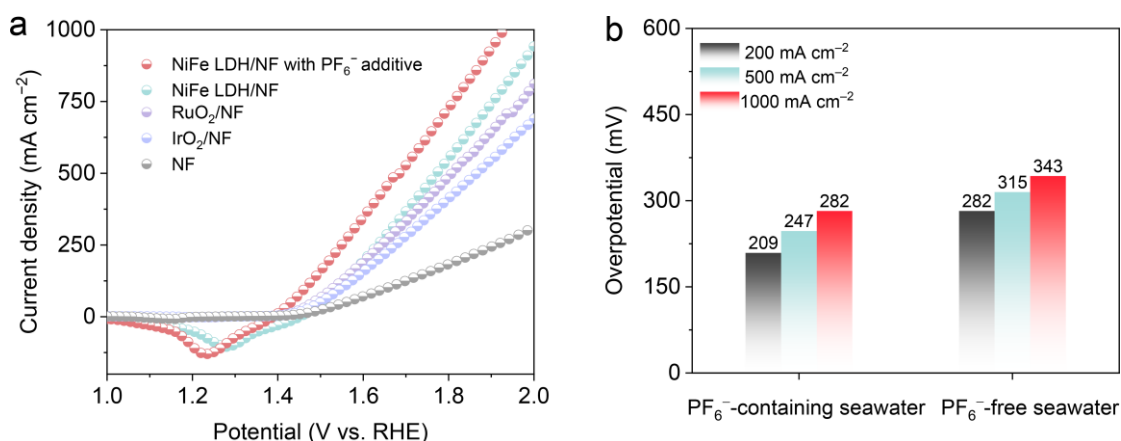

**Supplementary Fig. 6 | Evaluation of activities. (a)** Polarization curves of NiFe LDH/NF in  $\text{PF}_6^-$ -free and  $\text{PF}_6^-$ -containing seawater, alongside  $\text{RuO}_2/\text{NF}$ ,  $\text{IrO}_2/\text{NF}$  and NF in  $\text{PF}_6^-$ -free seawater without  $iR$  compensation. The corresponding solution resistances are  $1.700 \pm 0.03 \, \Omega$  and  $1.544 \pm 0.01 \, \Omega$  for NiFe LDH/NF, and  $1.767 \pm 0.02 \, \Omega$ ,  $1.762 \pm 0.02 \, \Omega$ , and  $1.757 \pm 0.05 \, \Omega$  for  $\text{RuO}_2/\text{NF}$ ,  $\text{IrO}_2/\text{NF}$ , and NF, respectively. The area of all electrodes is  $0.25 \, \text{cm}^2$ . **(b)** Comparison of overpotentials for NiFe LDH/NF in  $\text{PF}_6^-$ -free and  $\text{PF}_6^-$ -containing seawater with 100%  $iR$  correction. Source data are provided as a Source Data file.

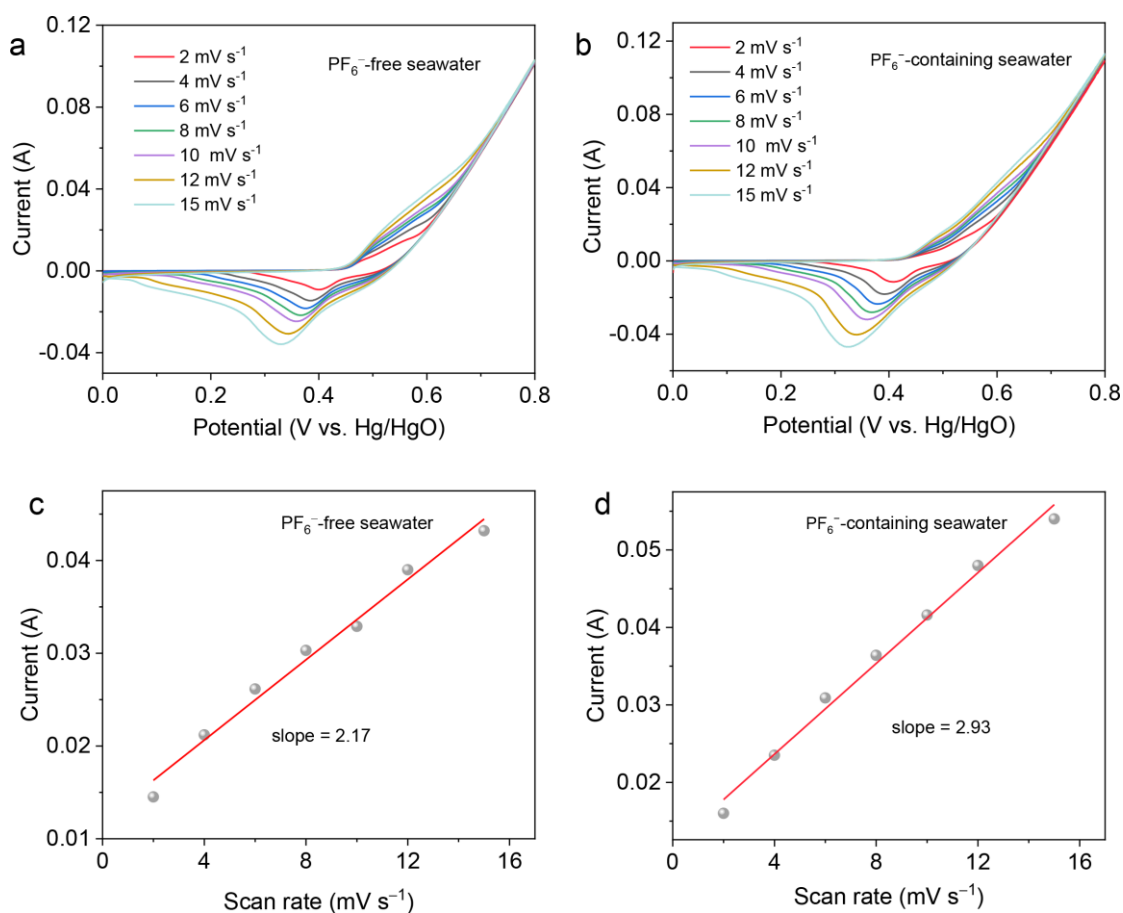

**Supplementary Fig. 7 | Evaluation of activities.** CV curves of NiFe LDH/NF in **(a)**  $\text{PF}_6^-$ -free and **(b)**  $\text{PF}_6^-$ -containing seawater and corresponding relationships between oxidation peak currents and scan rates of NiFe LDH/NF in **(c)**  $\text{PF}_6^-$ -free and **(d)**  $\text{PF}_6^-$ -containing seawater, respectively. Slopes of  $2.17 \pm 0.01$  and  $2.93 \pm 0.03$  were obtained from triplicate tests in  $\text{PF}_6^-$ -free and  $\text{PF}_6^-$ -containing seawater, respectively. Only representative data are shown. Source data are provided as a Source Data file.

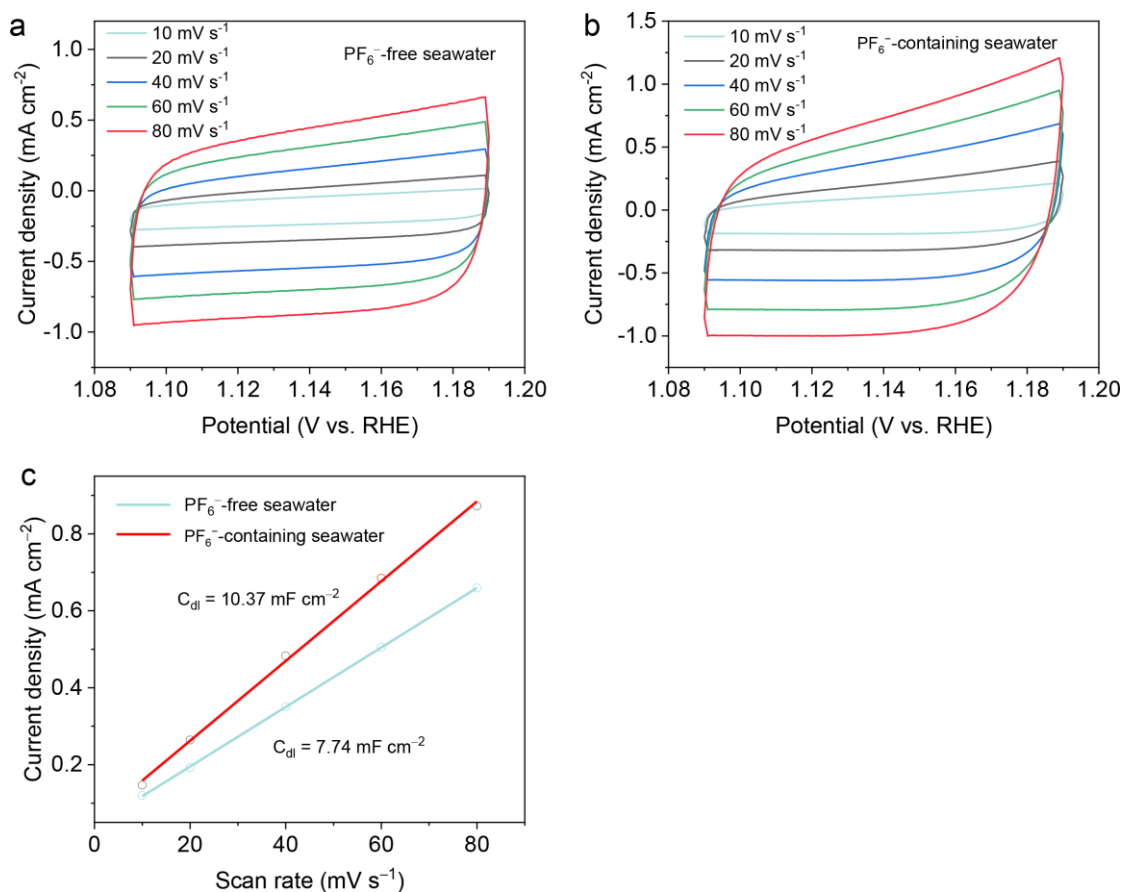

**Supplementary Fig. 8 | Electrochemical double-layer capacities ( $C_{dl}$ ) measurements.**

CV curves in the non-Faradaic zone at various scan rates for NiFe LDH/NF in **(a)**  $\text{PF}_6^-$ -free and **(b)**  $\text{PF}_6^-$ -containing seawater without  $iR$  correction. **(c)** Comparison of the  $C_{dl}$  values for NiFe LDH/NF in  $\text{PF}_6^-$ -free and  $\text{PF}_6^-$ -containing seawater. Source data are provided as a Source Data file.

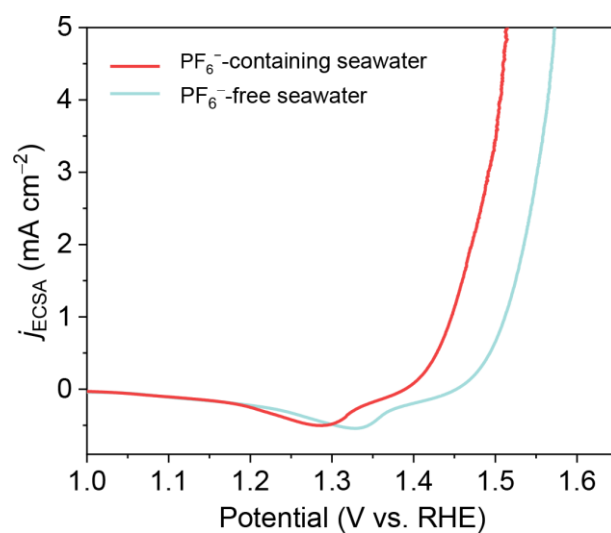

**Supplementary Fig. 9 | Evaluation of activities.** Polarization curves of NiFe LDH/NF in PF<sub>6</sub><sup>-</sup>-free and PF<sub>6</sub><sup>-</sup>-containing seawater with ECSA fitting with 100%  $iR$  correction. Source data are provided as a Source Data file.

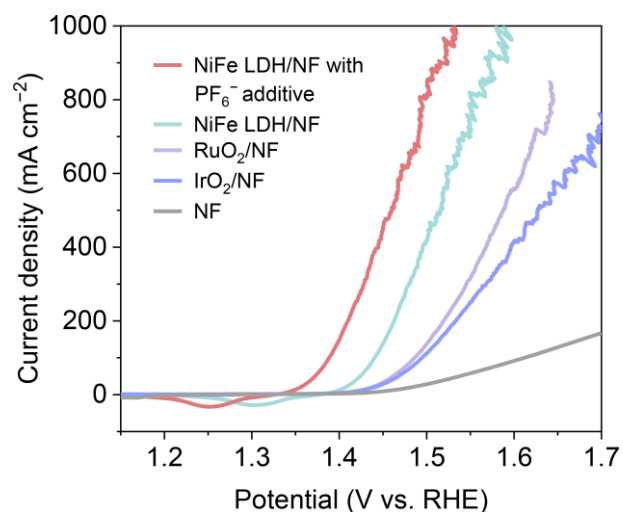

**Supplementary Fig. 10 | Evaluation of activities.** Polarization curves of NiFe LDH/NF in  $\text{PF}_6^-$ -free and  $\text{PF}_6^-$ -containing seawater, along with  $\text{RuO}_2/\text{NF}$ ,  $\text{IrO}_2/\text{NF}$ , and NF in  $\text{PF}_6^-$ -free seawater with 100%  $iR$  correction, measured at a slow scan rate of  $1 \text{ mV s}^{-1}$ . This slow scan rate was employed to avoid interference from non-OER chemical processes to ensure reliable determination of the Tafel slope. Source data are provided as a Source Data file.

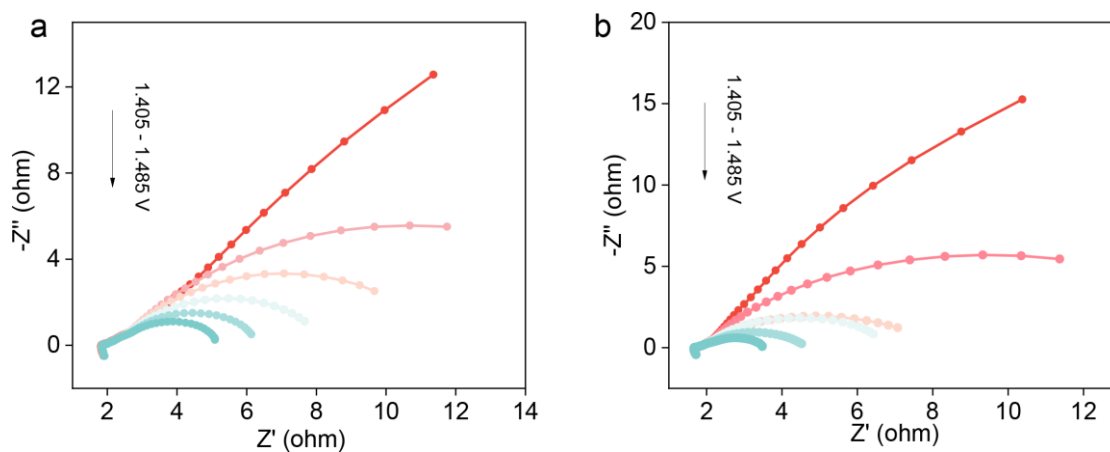

**Supplementary Fig. 11 | Evaluation of kinetics.** Electrochemical impedance spectroscopy (EIS) Nyquist plots collected from 1.405 to 1.485 V (1.405, 1.415, 1.435, 1.455, 1.475, 1.485 V) over a frequency range of  $10^{-2}$  to  $10^5$  Hz for NiFe LDH/NF in **(a)**  $\text{PF}_6^-$ -free and **(b)**  $\text{PF}_6^-$ -containing seawater. Source data are provided as a Source Data file.

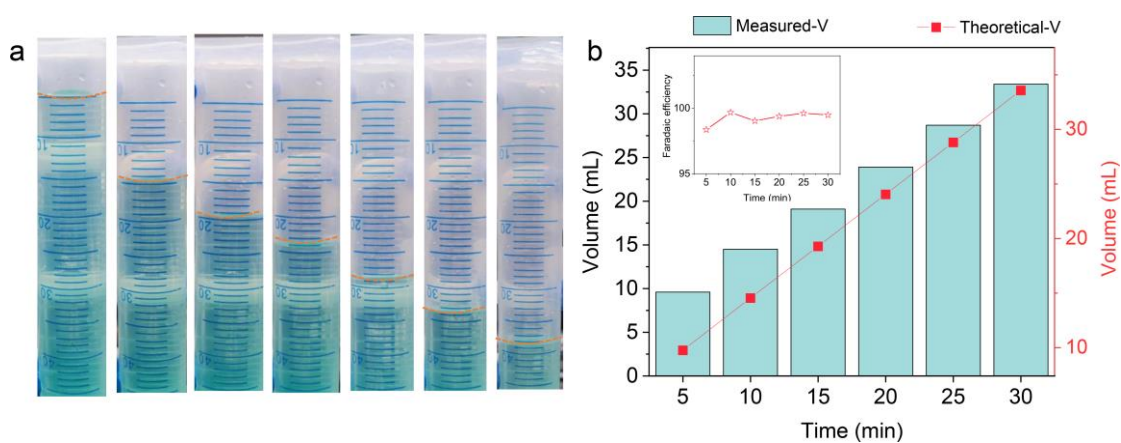

**Supplementary Fig. 12 | O<sub>2</sub> Faradaic efficiency measurements in PF<sub>6</sub><sup>-</sup>-containing seawater. (a)** Digital photographs of the collected O<sub>2</sub> during ASO. **(b)** Comparison of collected O<sub>2</sub> with theoretical values for NiFe LDH/NF in PF<sub>6</sub><sup>-</sup>-containing seawater at 1 A cm<sup>-2</sup>. Source data are provided as a Source Data file.

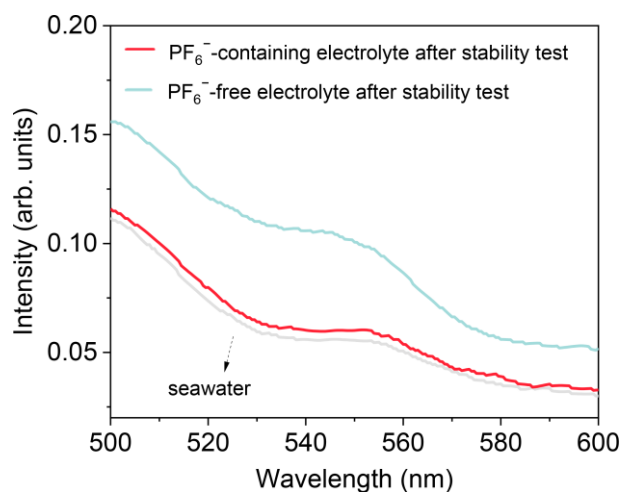

**Supplementary Fig. 13 | Chlorine precipitation tests.** Ultraviolet–visible (UV–vis) spectra of the  $\text{ClO}^-$  concentrations for the blank electrolyte and  $\text{PF}_6^-$ -free and  $\text{PF}_6^-$ -containing electrolyte for NiFe LDH/NF after the stability test at  $1 \text{ A cm}^{-2}$ . Source data are provided as a Source Data file.

We determined active chlorine concentrations by employing the DPD colorimetric method (*J. Electroanal. Chem.* **819**, 260–268 (2018); *Nano Today* **58**, 102454 (2024)) in conjunction with UV–vis spectroscopy. After operating the stability tests at  $1 \text{ A cm}^{-2}$ , 100  $\mu\text{L}$  of the electrolyte was combined with 50  $\mu\text{L}$  of both 1.0 M  $\text{H}_2\text{SO}_4$  and 2.0 M NaOH, followed by 4.8 mL of deionized water. Subsequently, 250  $\mu\text{L}$  of DPD reagent and phosphate-buffered saline ( $\text{pH}=6.5$ ) were introduced. This mixture developed a pink hue, indicative of chlorine, which was then detected at 550 nm.



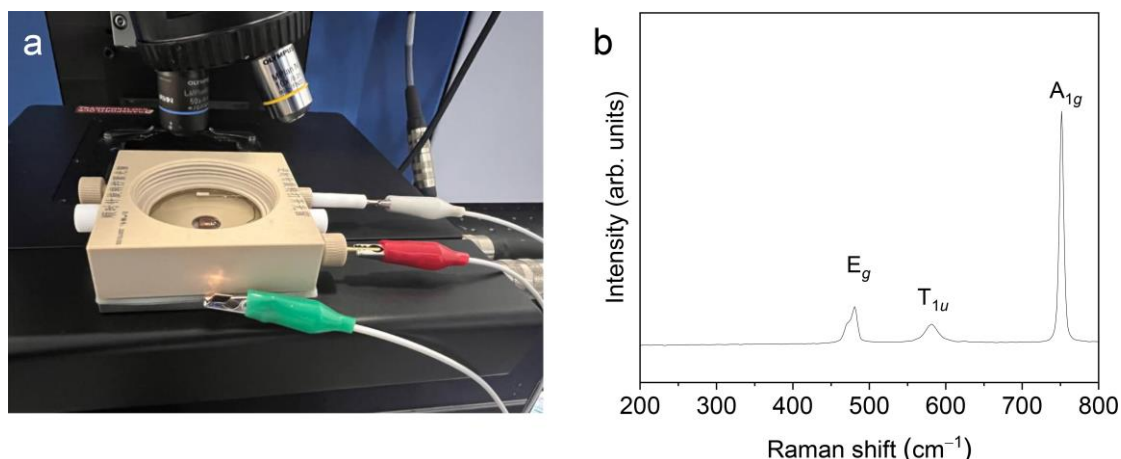

**Supplementary Fig. 14 | Raman spectrum. (a)** The photo of electrochemical cell for in situ Raman test. **(b)** Raman spectrum of  $\text{KPF}_6$ . Source data are provided as a Source Data file.

The Raman peaks at 480, 581, and 752  $\text{cm}^{-1}$  are assigned to the  $E_g$ ,  $T_{1u}$ , and  $A_{1g}$  vibrational modes of  $\text{PF}_6^-$ , respectively. The  $A_{1g}$  vibration of  $\text{PF}_6^-$  represents a fully symmetric stretching vibration in which all P–F bonds simultaneously lengthen or shorten. The  $E_g$  vibration is a doubly degenerate bending vibration, typically described as a combination of bond stretching and contraction across opposing P–F bonds (*J. Fluorine Chem.* **101**, 173–179 (2000); *J. Mol. Struct.* **1026**, 145–149 (2012); *Spectrochim. Acta A* **153**, 651–654 (2016)). Under intercalation conditions, the  $E_g$  bending mode becomes discernible due to confinement of  $\text{PF}_6^-$  within the interlayers, where the local coordination environment partially breaks the octahedral symmetry and modifies the polarizability change associated with bending vibrations. The  $A_{1g}$  symmetric stretching mode is weak or nearly absent in this intercalated state, presumably because  $\text{PF}_6^-$  is dispersed and partially disordered between the layers. As the applied potential increases,  $\text{PF}_6^-$  gradually accumulates on the electrode surface driven by a higher applied electric field, thereby enhancing the  $A_{1g}$  response.

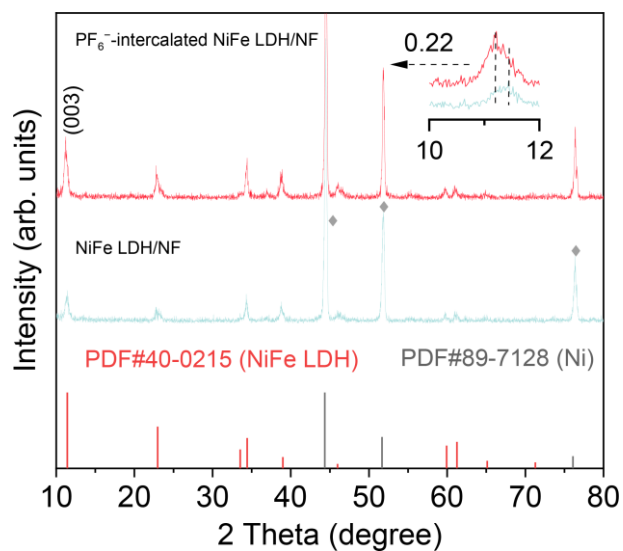

**Supplementary Fig. 15 | XRD patterns.** Comparison of the XRD patterns of NiFe LDH/NF before and after being held at 1.15 V for 10 min in PF<sub>6</sub><sup>-</sup>-containing seawater. Source data are provided as a Source Data file.

The (003) diffraction peak shifts to lower 2θ values after the treatment, signifying an increase in interlayer spacing of NiFe LDH.

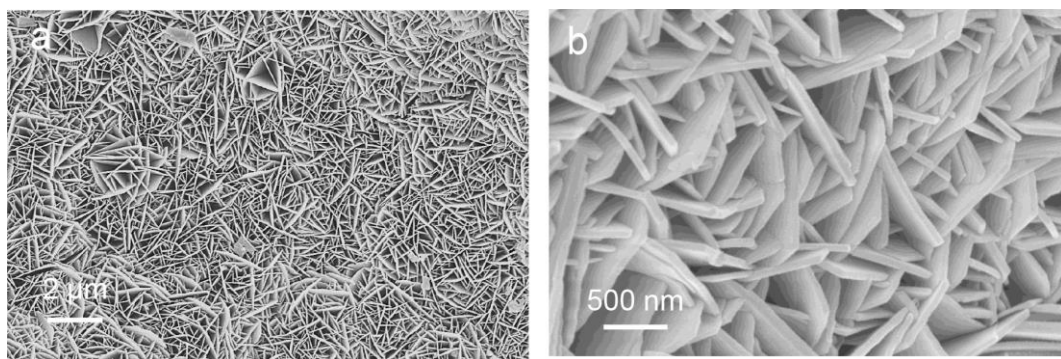

**Supplementary Fig. 16 | SEM images.** (a) Low- and (b) high-magnification SEM images of NiFe LDH/NF after being held at 1.15 V for 10 min in  $\text{PF}_6^-$ -containing seawater.

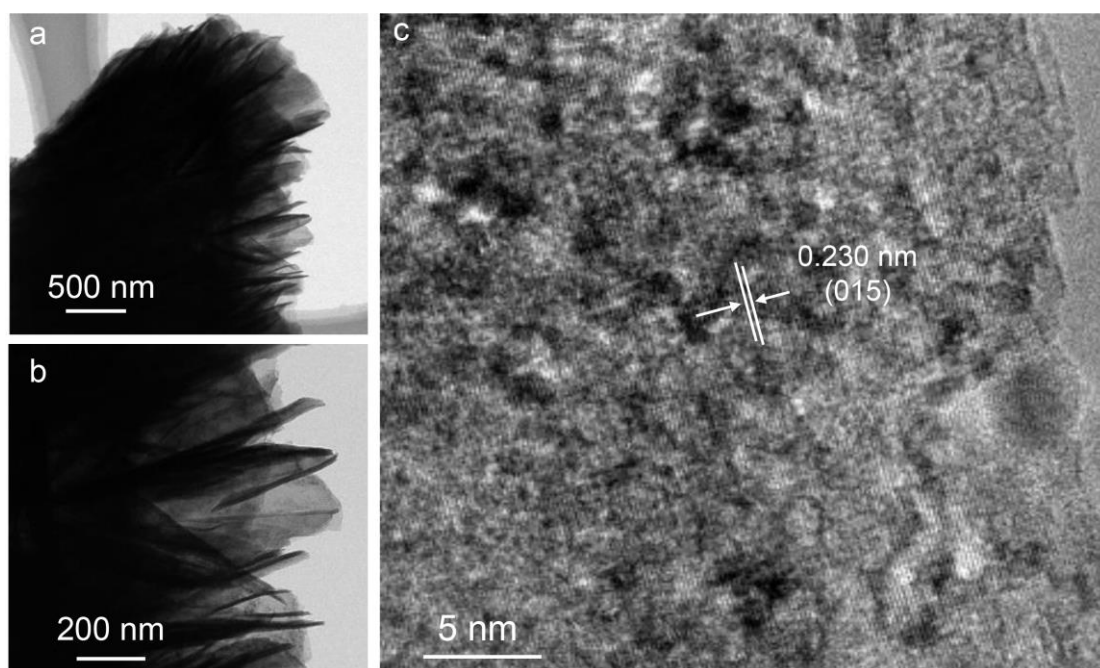

**Supplementary Fig. 17 | TEM images and HRTEM image. (a)** Low- and **(a)** high-magnification TEM images of NiFe LDH after being held at 1.15 V for 10 min in  $\text{PF}_6^-$ -containing seawater. **(c)** HRTEM image of NiFe LDH after being held at 1.15 V for 10 min in  $\text{PF}_6^-$ -containing seawater.

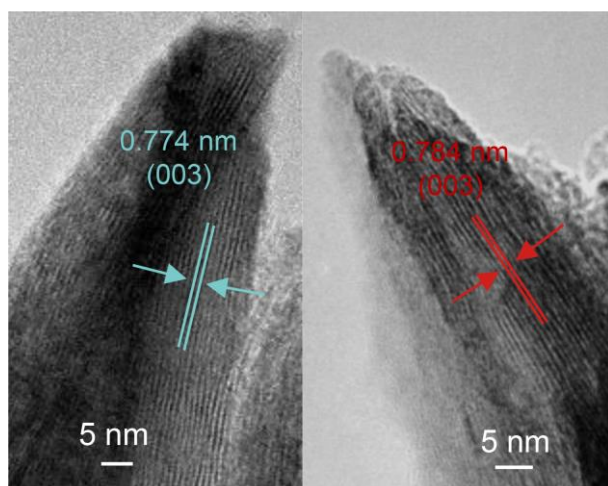

**Supplementary Fig. 18 | HRTEM images.** HRTEM images of NiFe LDH before (left) and after (right) being held at 1.15 V for 10 min in  $\text{PF}_6^-$ -containing seawater.

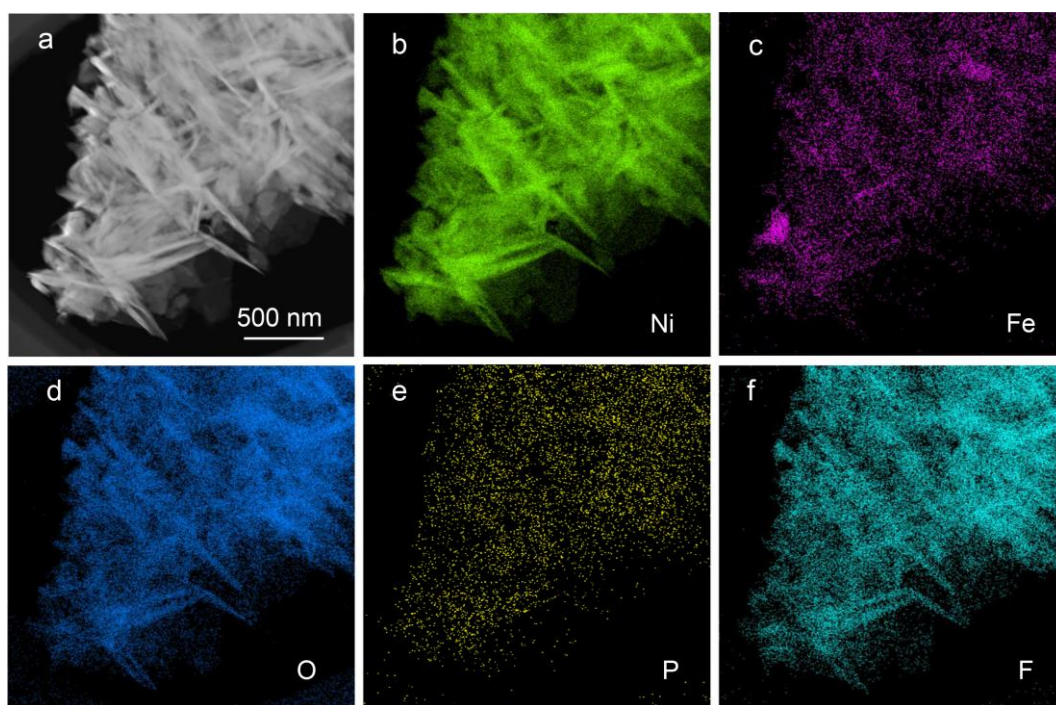

**Supplementary Fig. 19 | Elemental distributions.** (a) HAADF-STEM image and (b–f) corresponding elemental mapping images of NiFe LDH after being held at 1.15 V for 10 min in  $\text{PF}_6^-$ -containing seawater.

As shown in Supplementary Figs. 16, 17a, b, and 19a, the NiFe LDH after being held at 1.15 V for 10 min in  $\text{PF}_6^-$ -containing seawater retains the characteristic two-dimensional nanosheet morphology of pristine NiFe LDH. High-resolution TEM analysis further reveals a lattice spacing of 0.230 nm, corresponding to the (015) crystal planes of NiFe LDH (Supplementary Fig. 17c). Notably, NiFe LDH after being held at 1.15 V for 10 min in  $\text{PF}_6^-$ -containing seawater results in an increase in the interlayer distance from 0.774 nm to 0.784 nm, as evidenced by HRTEM images (Supplementary Fig. 18). Moreover, HAADF-STEM image and its corresponding EDS elemental mapping images confirm the uniform distribution of P and F elements throughout the NiFe LDH nanosheets (Supplementary Fig. 19). These results collectively demonstrate the successful electrochemical intercalation of  $\text{PF}_6^-$  into the interlayer galleries of NiFe LDH under applied potential.

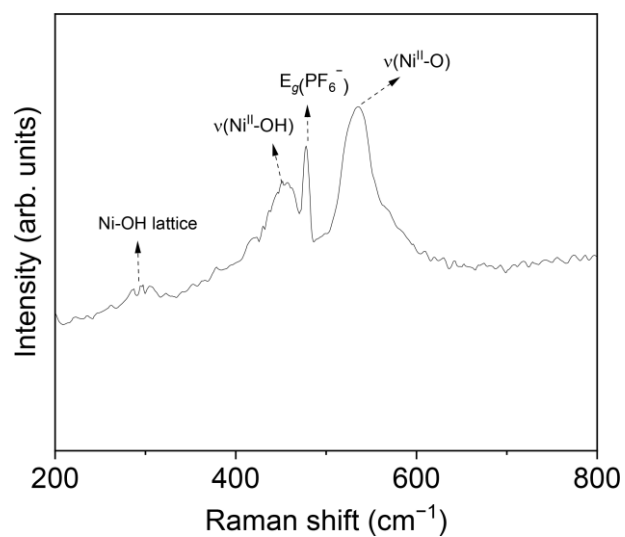

**Supplementary Fig. 20 | Raman spectrum.** Raman spectrum of PF<sub>6</sub><sup>-</sup>-intercalated NiFe LDH. Source data are provided as a Source Data file.

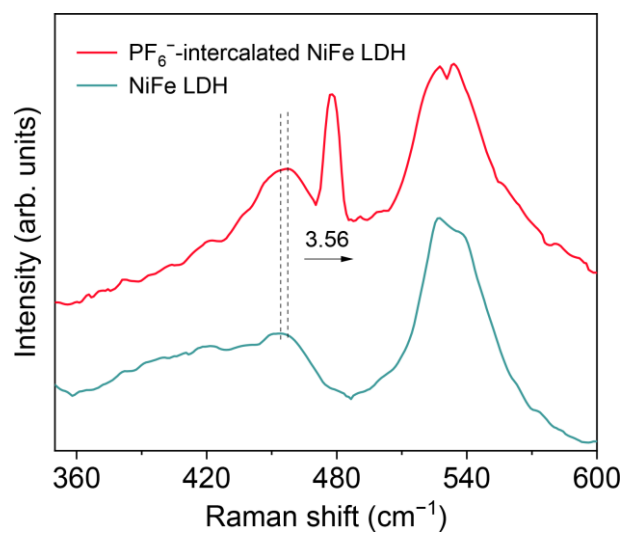

**Supplementary Fig. 21 | Raman spectra.** Comparison of Raman spectra of PF<sub>6</sub><sup>-</sup>-intercalated NiFe LDH and NiFe LDH at OCP. Source data are provided as a Source Data file.



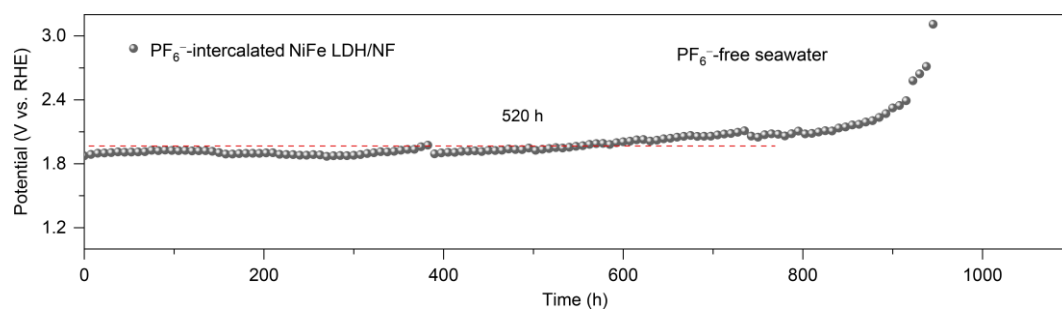

**Supplementary Fig. 22 | Chronopotentiometry test.** Chronopotentiometry curve operated at  $2 \text{ A cm}^{-2}$  for  $\text{PF}_6^-$ -intercalated NiFe LDH/NF in  $\text{PF}_6^-$ -free seawater without  $iR$  correction. Source data are provided as a Source Data file.

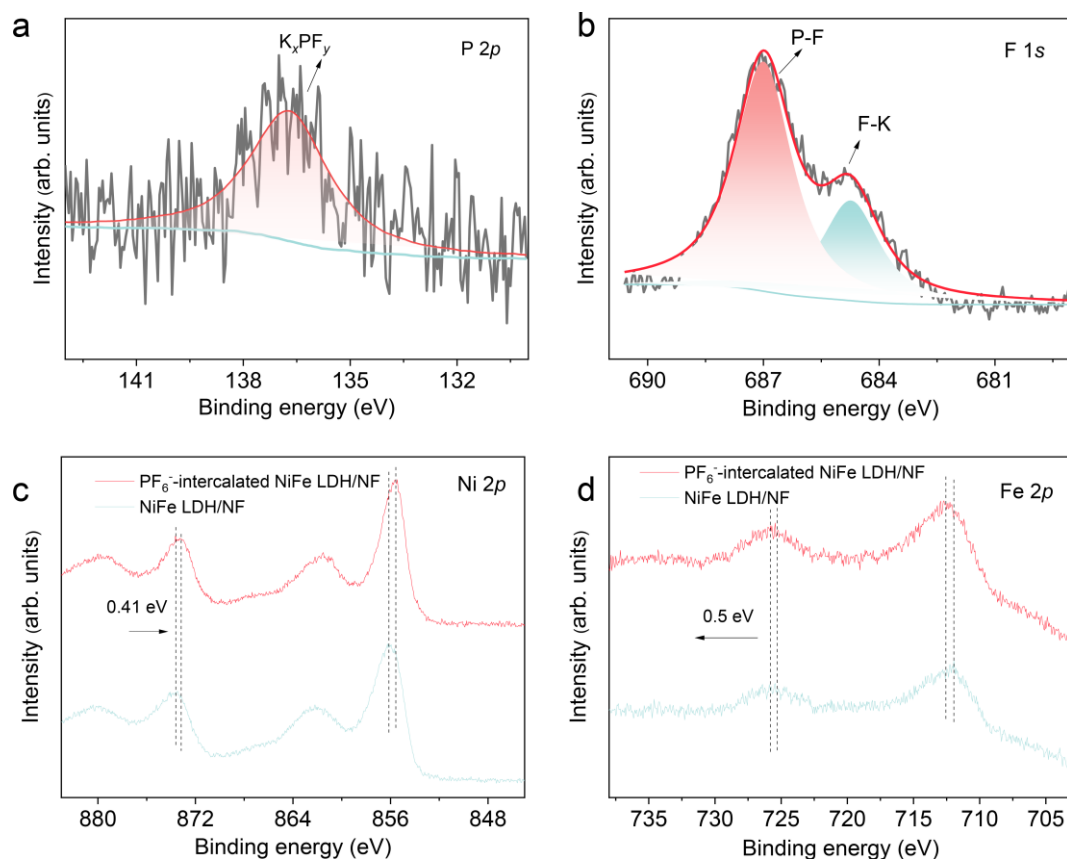

**Supplementary Fig. 23 | XPS spectra.** XPS spectra of  $\text{PF}_6^-$ -intercalated NiFe LDH in the **(a)** P 2*p* and **(b)** F 1*s* regions. Comparison of XPS spectra of  $\text{PF}_6^-$ -intercalated NiFe LDH and NiFe LDH in the **(c)** Ni 2*p* and **(d)** Fe 2*p* regions. Source data are provided as a Source Data file.

The P 2*p* spectrum (Supplementary Fig. 23a) displays a peak at 136.7 eV, which is associated with the presence of  $\text{K}_x\text{PF}_y$ . Upon deconvolution, the F 1*s* XPS spectrum (Supplementary Fig. 23b) reveals two distinct peaks at 686.9 and 684.7 eV, corresponding to P–F and F–K, respectively (*ACS Appl. Mater. Interfaces* **11**, 22449–22456 (2019); *ACS Appl. Mater. Interfaces* **12**, 34873–34881 (2020)).

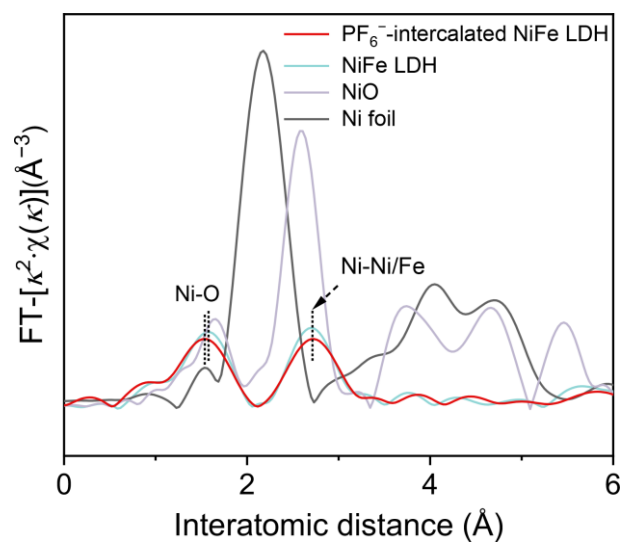

**Supplementary Fig. 24** | First derivative Ni K-edge spectra of  $\text{PF}_6^-$ -intercalated NiFe LDH and NiFe LDH, NiO, and Ni foil. Source data are provided as a Source Data file.

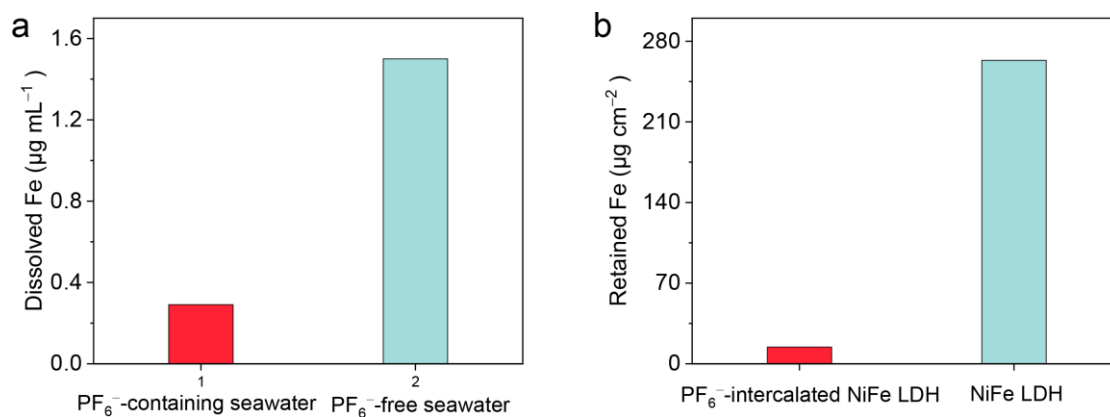

**Supplementary Fig. 25 | (a)** Evaluation of Fe ion leaching into electrolytes from NiFe LDH/NF electrodes in  $\text{PF}_6^-$ -free and  $\text{PF}_6^-$ -containing seawater after 120 hours of chronoamperometry tests at  $1 \text{ A cm}^{-2}$ . **(b)** Evaluation of retained Fe in  $\text{PF}_6^-$ -intercalated NiFe LDH and NiFe LDH after 120 hours of chronoamperometry tests at  $1 \text{ A cm}^{-2}$ .

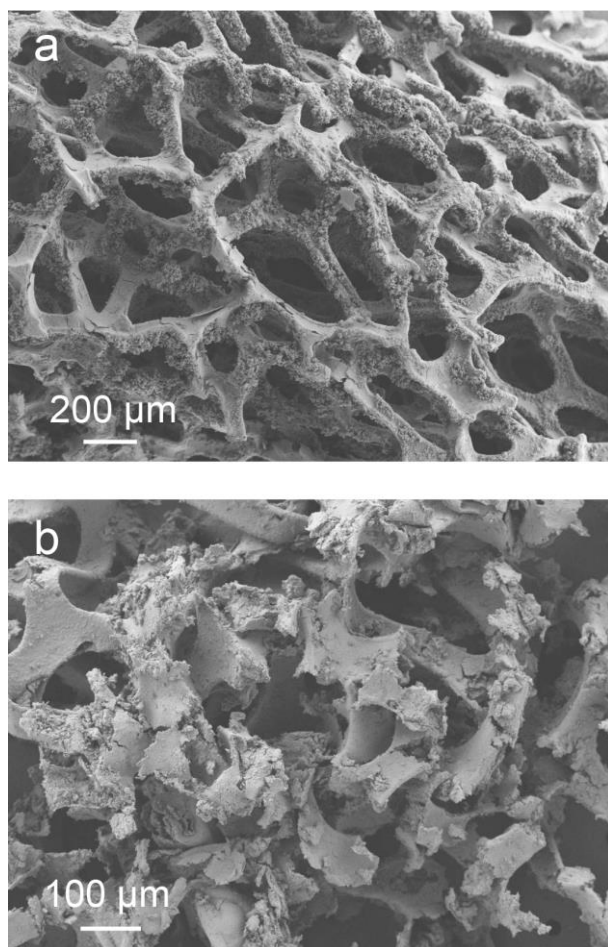

**Supplementary Fig. 26 | SEM images.** SEM images of NiFe LDH/NF after 120 h chronoamperometry tests at  $1 \text{ A cm}^{-2}$  in **(a)**  $\text{PF}_6^-$ -containing and **(b)**  $\text{PF}_6^-$ -free seawater.

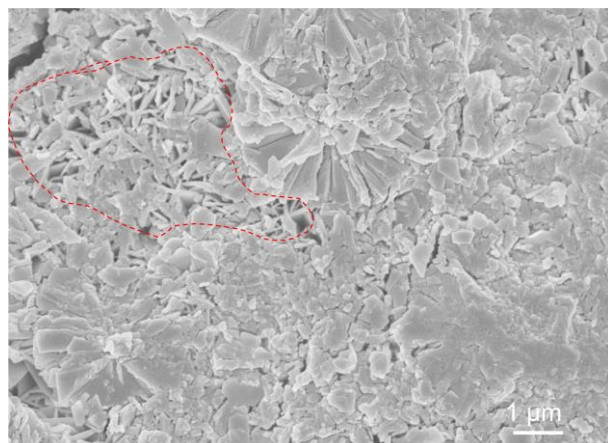

**Supplementary Fig. 27** | SEM image of NiFe LDH/NF after stability test at  $1 \text{ A cm}^{-2}$  in  $\text{PF}_6^-$ -containing seawater.

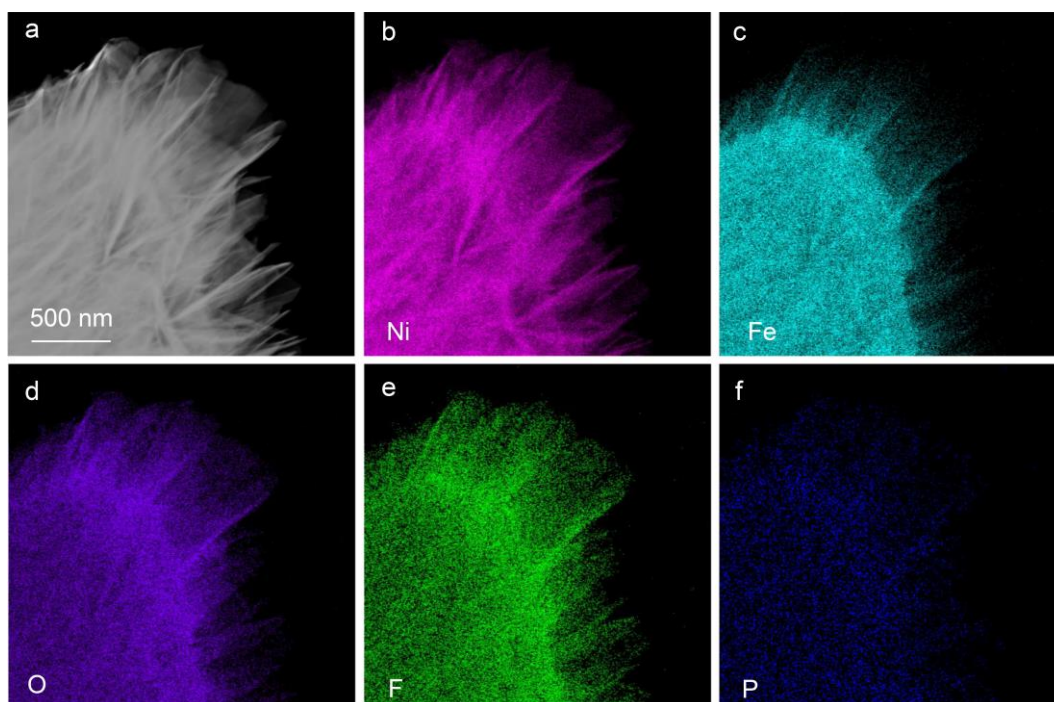

**Supplementary Fig. 28 | Elemental distributions. (a)** HAADF-STEM image and **(b–f)** corresponding elemental mapping images of NiFe LDH after stability test in  $\text{PF}_6^-$ -containing seawater.

EDS analyses show the presence of P, F, Ni, Fe and O across the nanosheets, further demonstrating that  $\text{PF}_6^-$  incorporation stabilizes Fe and mitigates its leaching.

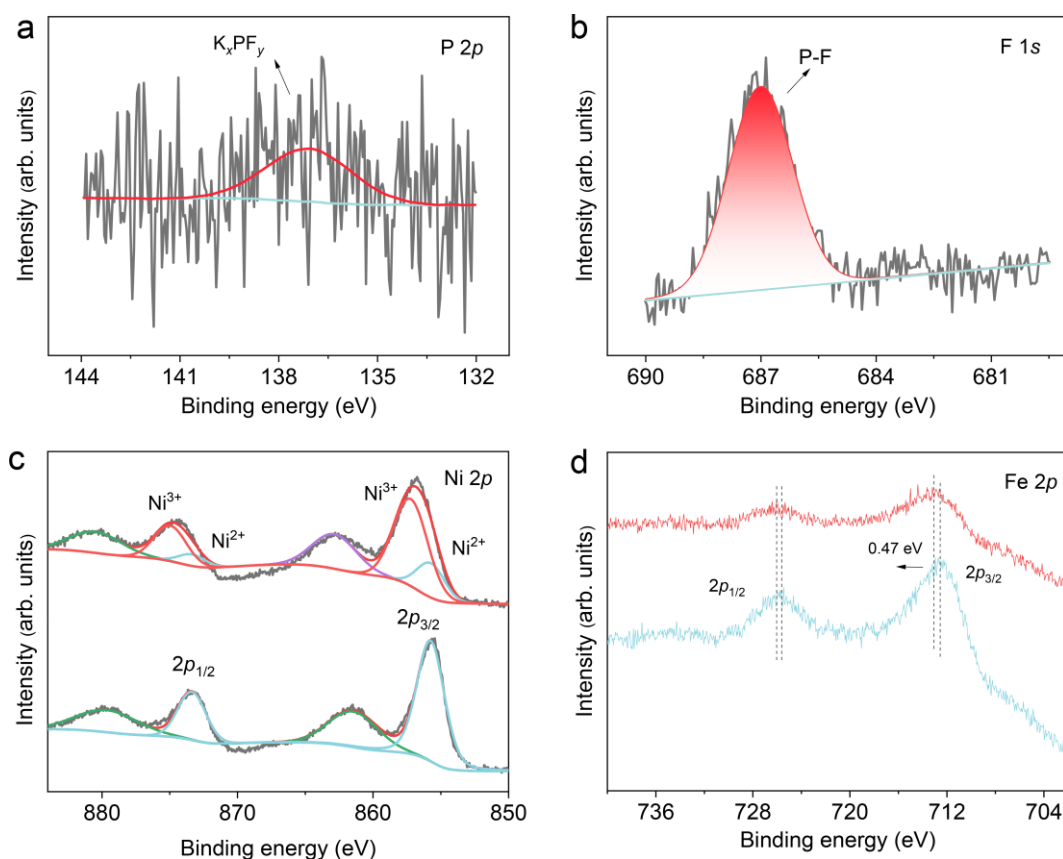

**Supplementary Fig. 29 | XPS spectra.** XPS spectra of NiFe LDH/NF in the **(a)** P 2*p* and **(b)** F 1*s* regions after stability test in PF<sub>6</sub><sup>−</sup>-containing seawater. XPS spectra of NiFe LDH/NF in the **(c)** Ni 2*p* and **(d)** Fe 2*p* regions before and after stability test in PF<sub>6</sub><sup>−</sup>-containing seawater. Source data are provided as a Source Data file.

XPS analyses reveal that the P 2*p* and F 1*s* signals (Supplementary Fig. 29a, b) are relatively weak but consistent with those observed prior to electrolysis (Supplementary Fig. 23a, b), possibly due to partial deintercalation of PF<sub>6</sub><sup>−</sup> from the interlayers under high potential. After long-term operation, the Ni 2*p* peak shifts to higher binding energy, indicating extensive surface oxidation from Ni<sup>2+</sup> to Ni<sup>3+</sup> (Supplementary Fig. 29c). Meanwhile, the Fe 2*p* spectrum shows only a minor shift without notable intensity loss (Supplementary Fig. 29d), also supporting effective stabilization of Fe by PF<sub>6</sub><sup>−</sup> incorporation.



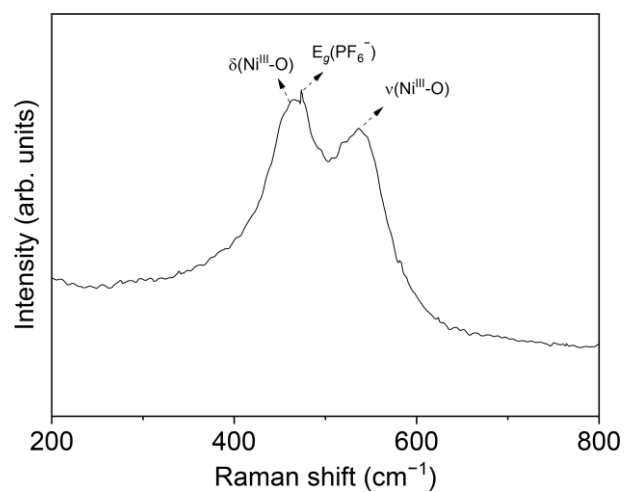

**Supplementary Fig. 30 | Raman spectrum.** Raman spectrum of NiFe LDH/NF after stability test in  $\text{PF}_6^-$ -containing seawater. Source data are provided as a Source Data file.

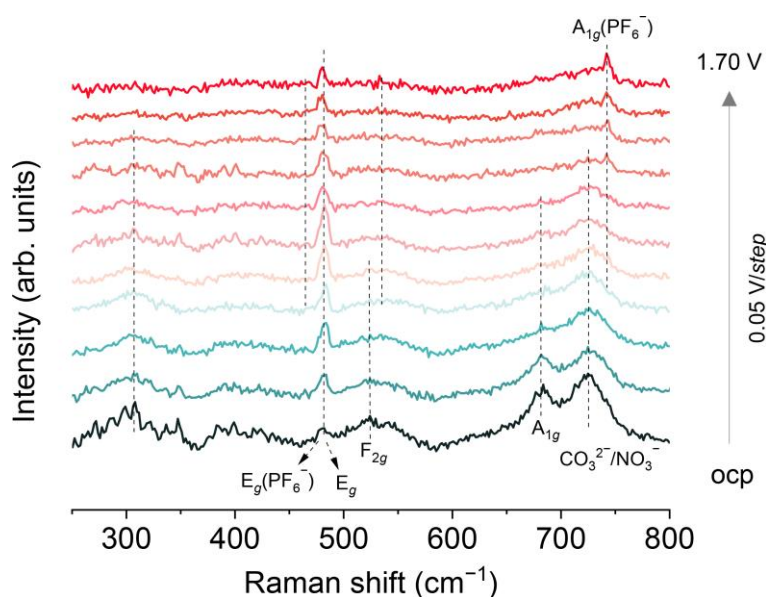

**Supplementary Fig. 31 | Operando Raman spectra.** Operando Raman spectra of CoFe LDH in  $\text{PF}_6^-$ -containing seawater during ASO. Source data are provided as a Source Data file.

Operando Raman spectra of CoFe LDH in  $\text{PF}_6^-$ -containing seawater were collected from OCP to 1.70 V vs. RHE (step: 0.05 V) to investigate  $\text{PF}_6^-$  intercalation and surface adsorption behaviors. The spectrum displays signals at 482, 523, and 698  $\text{cm}^{-1}$ , corresponding to the  $E_g$ ,  $F_{2g}$ , and  $A_{1g}$  vibrations of the symmetric stretching mode of Co–O and the bending mode of O–Co–O (*CrystEngComm* **24**, 6018–6030 (2022); *Chem. Mater.* **32**, 4303 (2020); *ACS Catal.* **8**, 1238–1247 (2018); *Chem. Eng. J.* **472**, 145076 (2023)). As the potential increases, the  $A_{1g}$  and  $F_{2g}$  bands and the Co–OH lattice signal at 300  $\text{cm}^{-1}$  gradually vanish, and the shoulder for  $E_g$  and  $F_{2g}$  modes at 464 and 536  $\text{cm}^{-1}$  appears (partially masked by  $\text{PF}_6^-$  signals), indicating the formation of CoOOH. Interestingly, the 482  $\text{cm}^{-1}$   $E_g$  mode (overlapping with  $\text{PF}_6^-$  vibrational modes) initially increases in intensity (which was expected to decrease monotonically), along with the fading of the 727  $\text{cm}^{-1}$   $\text{CO}_3^{2-}/\text{NO}_3^-$  peak, suggesting  $\text{PF}_6^-$  intercalation. At higher potentials, the 482  $\text{cm}^{-1}$  mode weakens, indicating partial anion deintercalation, and the 727  $\text{cm}^{-1}$   $A_{1g}$  vibration of  $\text{PF}_6^-$  emerges and intensifies, implying surface adsorption and accumulation of  $\text{PF}_6^-$  under an applied electric field. These results support that

$\text{PF}_6^-$  follows a potential-driven intercalation and adsorption for CoFe LDH, consistent with the observations for NiFe LDH.

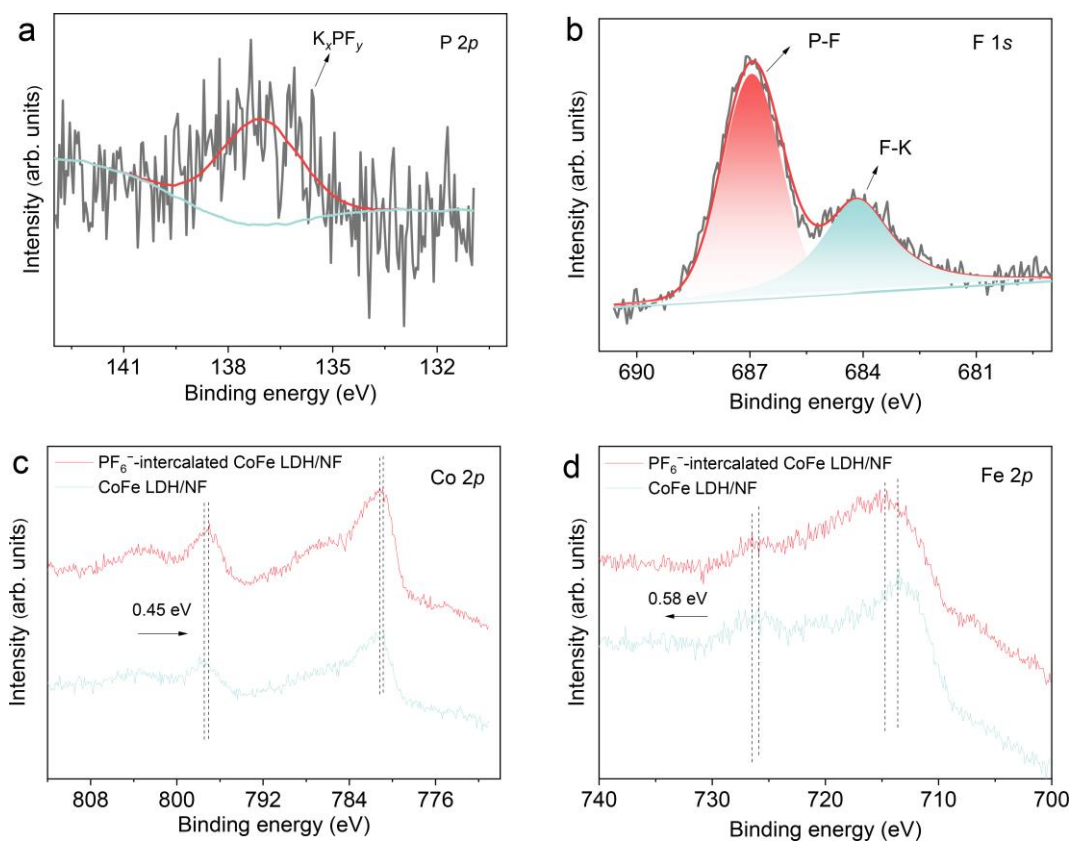

**Supplementary Fig. 32 | XPS spectra.** XPS spectra of  $\text{PF}_6^-$ -intercalated CoFe LDH in the **(a)** P 2p and **(b)** F 1s regions. Comparison of XPS spectra of  $\text{PF}_6^-$ -intercalated CoFe LDH and CoFe LDH in the **(c)** Co 2p and **(d)** Fe 2p regions. Source data are provided as a Source Data file.

The P 2p and F 1s spectra of  $\text{PF}_6^-$ -intercalated CoFe LDH (Supplementary Fig. 32a, b) exhibit similar spectral features to those observed for  $\text{PF}_6^-$ -intercalated NiFe LDH, further confirming the successful incorporation of  $\text{PF}_6^-$  into the CoFe LDH. Additionally, the Co 2p and Fe 2p peaks shift toward lower and higher binding energies, respectively (Supplementary Fig. 32c, d), consistent with the electronic modulation observed in NiFe LDH.

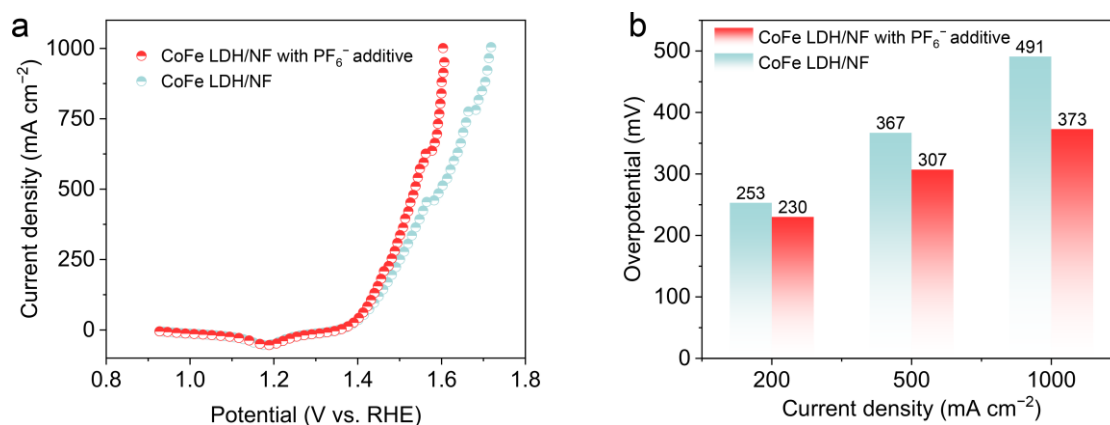

**Supplementary Fig. 33 | Evaluation of activities. (a)** Polarization curves with 100%  $iR$  correction and **(b)** comparison of overpotential for CoFe LDH/NF measured in  $\text{PF}_6^-$ -free versus  $\text{PF}_6^-$ -containing seawater. Source data are provided as a Source Data file.

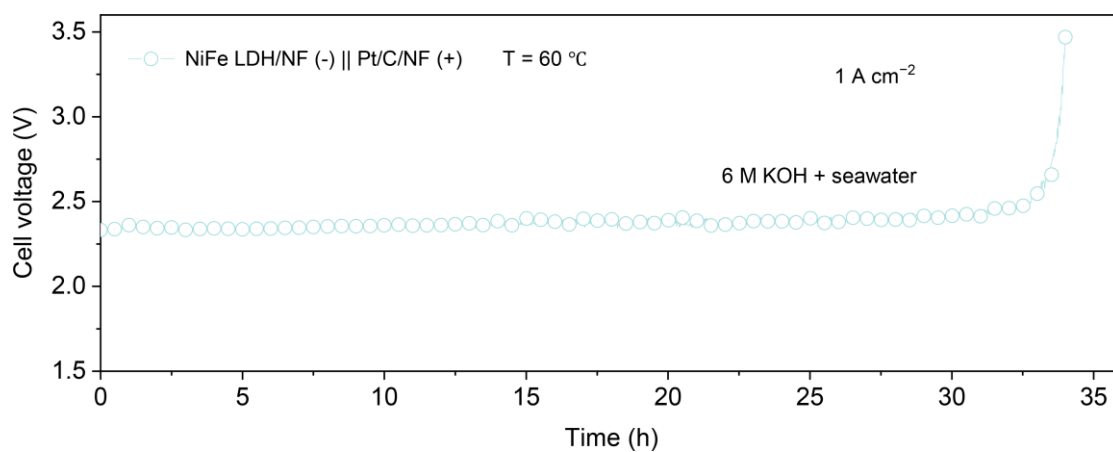

**Supplementary Fig. 34 | Chronopotentiometric stability test.** Chronopotentiometry curve of the NiFe LDH/NF||Pt/C/NF electrolyzer conducted in PF<sub>6</sub><sup>-</sup>-free seawater at 1.0 A cm<sup>-2</sup> without *iR* correction. Source data are provided as a Source Data file.

**Supplementary Table 1.** Elements contents of NiFe LDH determined by ICP-MS.

| Element | Wt.%  | Atomic% |
|---------|-------|---------|
| Ni      | 57.84 | 34.71   |
| Fe      | 17.52 | 11.05   |
| O       | 24.64 | 54.24   |

**Supplementary Table 2.** Comparison of the overpotential of NiFe LDH/NF in PF<sub>6</sub><sup>-</sup> containing seawater with reported anodic systems.

| Anode                                                                       | Electrolyte                                                    | <i>j</i> (mA cm <sup>-2</sup> ) | Overpotential@ <i>j</i> (mV) | Ref.                                                            |
|-----------------------------------------------------------------------------|----------------------------------------------------------------|---------------------------------|------------------------------|-----------------------------------------------------------------|
| NiFe LDH/NF (with KPF <sub>6</sub> as electrolyte additive)                 | 1 M KOH + seawater + 20 mM PF <sub>6</sub> <sup>-</sup>        | 1000                            | 282                          | This work                                                       |
|                                                                             |                                                                | 500                             | 247                          |                                                                 |
|                                                                             |                                                                | 200                             | 209                          |                                                                 |
| NiFe LDH/NF (with Na <sub>3</sub> PO <sub>4</sub> as electrolyte additive)  | 1 M KOH + 0.5 M NaCl + 0.5 M Na <sub>3</sub> PO <sub>4</sub>   | 500                             | 327                          | <i>J. Energy Chem.</i> <b>72</b> , 361–369 (2022)               |
| P <sub>3</sub> O <sub>10</sub> <sup>5-</sup> -Ni(OH) <sub>2</sub> /NF       | 1 M KOH + seawater                                             | 400                             | 340                          | <i>Adv. Energy Mater.</i> <b>15</b> , 2402883 (2025)            |
| Ir/CoFe LDH/CP                                                              | 6 M NaOH + 2.8 M NaCl                                          | 10                              | 202                          | <i>Nat. Commun.</i> <b>15</b> , 1973 (2024)                     |
| PO <sub>4</sub> <sup>3-</sup> -NiFe LDH/TM                                  | 6 M KOH + Seawater                                             | 1000                            | 330                          | <i>Nat. Commun.</i> <b>15</b> , 10351 (2024)                    |
| Ni <sub>3</sub> FeN@PO <sub>4</sub> <sup>3-</sup> /NF                       | 1 M KOH + seawater                                             | 1000                            | 344                          | <i>Adv. Mater.</i> <b>37</b> , 2415421 (2024)                   |
| CoFePBA/Co <sub>2</sub> P/NF                                                | 20 wt % NaOH + saturated NaCl                                  | 200                             | 310                          | <i>Angew. Chem. Int. Ed.</i> <b>62</b> , e202309882 (2023)      |
| NiFe/NiS <sub>x</sub> /NF                                                   | 6 M KOH + 1.5 M NaCl                                           | 400                             | 396                          | <i>Proc. Natl. Acad. Sci. U. S. A.</i> <b>116</b> , 6624 (2019) |
| NiFe LDH/NF (with Na <sub>2</sub> SO <sub>4</sub> as electrolyte additive)  | 1 M NaOH + 0.5 M NaCl + 0.05 M Na <sub>2</sub> SO <sub>4</sub> | 400                             | 340                          | <i>Angew. Chem. Int. Ed.</i> <b>60</b> , 22740–22744 (2021)     |
| S-(Ni,Fe)OOH/NF                                                             | 1 M KOH + seawater                                             | 100                             | 300                          | <i>Energy Environ. Sci.</i> <b>13</b> , 3439 (2020)             |
|                                                                             |                                                                | 500                             | 398                          |                                                                 |
| NiFeBa LDH/Ni mesh                                                          | 1 M NaOH + seawater + 0.05 M Na <sub>2</sub> SO <sub>4</sub>   | 400                             | 298                          | <i>Adv. Mater.</i> <b>36</b> , 2411302 (2024)                   |
| RuMoNi/NF                                                                   | 1 M KOH + seawater                                             | 500                             | 397                          | <i>Nat. Commun.</i> <b>14</b> , 3607 (2023)                     |
| Ni-Fe-Ce-B/MS                                                               | 1 M KOH + seawater                                             | 100                             | 271                          | <i>Appl. Catal. B Environ.</i> <b>343</b> , 123560 (2024)       |
| CrO <sub>4</sub> <sup>2-</sup> -NiFe LDH/Cr <sub>2</sub> O <sub>3</sub> /NF | 1 M KOH + seawater                                             | 1000                            | 323                          | <i>Nat. Commun.</i> <b>15</b> , 6624 (2024)                     |
| NiFe LDH/NF (with CrO <sub>4</sub> <sup>2-</sup> as electrolyte additive)   | 1 M KOH + seawater + 0.1 M CrO <sub>4</sub> <sup>2-</sup>      | 100                             | 253                          | <i>J. Colloid Interf. Sci.</i> <b>665</b> , 240–250 (2024)      |
| CoFe-C <sub>i</sub> @GQDs/NF                                                | 1 M KOH with 0.5 M NaCl                                        | 100                             | 254                          | <i>Nat. Sustain.</i> <b>7</b> , 158–167 (2024)                  |
| NiFePBA/Ni(OH) <sub>2</sub> /NF                                             | 1 M KOH + seawater                                             | 1000                            | 349                          | <i>Nano Today</i> <b>58</b> , 102454 (2024)                     |
| WO <sub>4</sub> <sup>2-</sup> -NiFe LDH/NF                                  | 1 M KOH + seawater                                             | 1000                            | 412                          | <i>Small</i> <b>20</b> , 2311431 (2024)                         |
| (NiFe)C <sub>2</sub> O <sub>4</sub> /NF                                     | 1 M KOH + seawater                                             | 1000                            | 349                          | <i>Angew. Chem. Int. Ed.</i> <b>63</b> , e202316522 (2024)      |



**Supplementary Table 3.** Comparison of our research with key researches on anions for chloride repulsion and extended electrolysis stability.

| Key anion                                                                                                                                                  | Anode                                                                 | Durability@j                                                                                   | Electrolyte                                                          | Ref.                                                               |
|------------------------------------------------------------------------------------------------------------------------------------------------------------|-----------------------------------------------------------------------|------------------------------------------------------------------------------------------------|----------------------------------------------------------------------|--------------------------------------------------------------------|
| PF <sub>6</sub> <sup>-</sup> (with KPF <sub>6</sub> as electrolyte additive)                                                                               | NiFe LDH/NF                                                           | 5000 h@1000 mA cm <sup>-2</sup><br>2300 h@2000 mA cm <sup>-2</sup><br>(three-electrode system) | 1 M KOH +<br>seawater + 20<br>mM PF <sub>6</sub> <sup>-</sup>        | This work                                                          |
| PO <sub>4</sub> <sup>3-</sup> (with Na <sub>3</sub> PO <sub>4</sub> as electrolyte additive)                                                               | NiFe LDH/NF                                                           | 500 h@500 mA cm <sup>-2</sup><br>(two-electrode system)                                        | 1 M KOH + 0.5<br>M NaCl+ 0.5<br>M Na <sub>3</sub> PO <sub>4</sub>    | <i>J. Energy Chem.</i> <b>72</b> , 361–369<br>(2022).              |
| P <sub>3</sub> O <sub>10</sub> <sup>5-</sup> (P <sub>3</sub> O <sub>10</sub> <sup>5-</sup> poly-oxyanion passivation layer on Ni(OH) <sub>2</sub> surface) | P <sub>3</sub> O <sub>10</sub> <sup>5-</sup> -Ni(OH) <sub>2</sub> /NF | 240 h@1400 mA cm <sup>-2</sup><br>(two-electrode system)                                       | 1 M KOH +<br>seawater                                                | <i>Adv. Energy Mater.</i> <b>15</b> ,<br>2402883 (2025)            |
| PO <sub>4</sub> <sup>3-</sup> (PO <sub>4</sub> <sup>3-</sup> -intercalated NiFe LDH)                                                                       | PO <sub>4</sub> <sup>3-</sup> -intercalated<br>NiFe LDH/TM            | 1000 h@1000 mA cm <sup>-2</sup><br>(two-electrode system)                                      | 6 M KOH +<br>Seawater                                                | <i>Nat. Commun.</i> <b>15</b> , 10351 (2024)                       |
| (PO <sub>4</sub> <sup>3-</sup> )<br>Ni <sub>3</sub> FeN@PO <sub>4</sub> <sup>3-</sup>                                                                      | Ni <sub>3</sub> FeN@PO <sub>4</sub> <sup>3-</sup> /NF                 | 2500 h@1000 mA cm <sup>-2</sup><br>(three-electrode system)                                    | 1 M KOH +<br>seawater                                                | <i>Adv. Mater.</i> <b>37</b> , 2415421 (2024)                      |
| PO <sub>4</sub> <sup>3-</sup> & Fe(CN) <sub>6</sub> <sup>3-</sup><br>(CoFePBA/Co <sub>2</sub> P)                                                           | CoFePBA/Co <sub>2</sub> P/NF                                          | 1000 h@200 mA cm <sup>-2</sup><br>(three-electrode system)                                     | 20 wt % NaOH<br>+ saturated<br>NaCl                                  | <i>Angew. Chem. Int. Ed.</i> <b>62</b> ,<br>e202309882 (2023)      |
| SO <sub>4</sub> <sup>2-</sup> (NiS <sub>x</sub> layer)                                                                                                     | NiFe/NiS <sub>x</sub> /NF                                             | 1000 h@400 mA cm <sup>-2</sup><br>(three-electrode system)                                     | 6 M KOH + 1.5<br>M NaCl                                              | <i>Proc. Natl. Acad. Sci. U. S. A.</i><br><b>116</b> , 6624 (2019) |
| SO <sub>4</sub> <sup>2-</sup> (with Na <sub>2</sub> SO <sub>4</sub> as electrolyte additive)                                                               | NiFe LDH/NF                                                           | 1000 h@400 mA cm <sup>-2</sup><br>(three-electrode system)                                     | 1 M NaOH +<br>0.5 M NaCl +<br>0.05 M Na <sub>2</sub> SO <sub>4</sub> | <i>Angew. Chem. Int. Ed.</i> <b>60</b> ,<br>22740–22744 (2021)     |
| SO <sub>4</sub> <sup>2-</sup> (with SO <sub>4</sub> <sup>2-</sup> -fixation layer on NiFeBa LDH)                                                           | NiFeBa LDH/Ni mesh                                                    | 10000 h@400 mA cm <sup>-2</sup><br>(three-electrode system)                                    | (1 M NaOH +<br>seawater +<br>0.05 M Na <sub>2</sub> SO <sub>4</sub>  | <i>Adv. Mater.</i> <b>36</b> , 2411302 (2024)                      |
| CO <sub>3</sub> <sup>2-</sup> & GQDs (CO <sub>3</sub> <sup>2-</sup> -intercalated CoFe LDH with GQDs anchoring)                                            | CoFe-C <sub>i</sub> @GQDs/NF                                          | 2800 h@1250 mA cm <sup>-2</sup><br>(three-electrode system)                                    | 1 M KOH with<br>0.5 M NaCl                                           | <i>Nat. Sustain.</i> <b>7</b> , 158–167 (2024)                     |
| C <sub>2</sub> O <sub>4</sub> <sup>2-</sup> & CO <sub>3</sub> <sup>2-</sup><br>((NiFe)C <sub>2</sub> O <sub>4</sub> )                                      | (NiFe)C <sub>2</sub> O <sub>4</sub> /NF                               | 600 h@1000 mA cm <sup>-2</sup><br>(three-electrode system)                                     | 1 M KOH +<br>seawater                                                | <i>Angew. Chem. Int. Ed.</i> <b>63</b> ,<br>e202316522 (2024)      |
| MoO <sub>4</sub> <sup>2-</sup> & O <sub>s</sub> -Cl (Os-Ni <sub>4</sub> Mo/MoO <sub>2</sub> )                                                              | Os-<br>Ni <sub>4</sub> Mo/MoO <sub>2</sub> /NF                        | 2500 h@500 mA cm <sup>-2</sup><br>(two-electrode system)                                       | 1 M KOH +<br>seawater                                                | <i>Adv. Mater.</i> <b>36</b> , 2408982 (2024)                      |

|                                                                                                                          |                                                                             |                                                             |                                                           |                                                            |
|--------------------------------------------------------------------------------------------------------------------------|-----------------------------------------------------------------------------|-------------------------------------------------------------|-----------------------------------------------------------|------------------------------------------------------------|
| MoO <sub>4</sub> <sup>2-</sup> (Mo leaching from RuMoNi)                                                                 | RuMoNi/NF                                                                   | 3000 h@500 mA cm <sup>-2</sup><br>(three-electrode system)  | 1 M KOH + seawater                                        | <i>Nat. Commun.</i> <b>14</b> , 3607 (2023)                |
| B(OH) <sub>4</sub> <sup>-</sup> (Ni-Fe-Ce-B)                                                                             | Ni-Fe-Ce-B/MS                                                               | 100 h@500 mA cm <sup>-2</sup><br>(three-electrode system)   | 1 M KOH + seawater                                        | <i>Appl. Catal. B Environ.</i> <b>343</b> , 123560 (2024)  |
| CrO <sub>4</sub> <sup>2-</sup> (CrO <sub>4</sub> <sup>2-</sup> -intercalated NiFe LDH/Cr <sub>2</sub> O <sub>3</sub> )   | CrO <sub>4</sub> <sup>2-</sup> -NiFe LDH/Cr <sub>2</sub> O <sub>3</sub> /NF | 1000 h@1000 mA cm <sup>-2</sup><br>(three-electrode system) | 1 M KOH + seawater                                        | <i>Nat. Commun.</i> <b>15</b> , 6624 (2024)                |
| CrO <sub>4</sub> <sup>2-</sup> (with CrO <sub>4</sub> <sup>2-</sup> as electrolyte additive)                             | NiFe LDH/NF                                                                 | 60 h@200 mA cm <sup>-2</sup><br>(three-electrode system)    | 1 M KOH + seawater + 0.1 M CrO <sub>4</sub> <sup>2-</sup> | <i>J. Colloid Interf. Sci.</i> <b>665</b> , 240–250 (2024) |
| SeO <sub>4</sub> <sup>2-</sup> (Co-NiSe <sub>2</sub> )                                                                   | Co-NiSe <sub>2</sub> /GC                                                    | 1500 h@500 mA cm <sup>-2</sup><br>(two-electrode system)    | 1 M KOH + seawater                                        | <i>Appl. Catal. B Environ.</i> <b>344</b> , 123658 (2024)  |
| SeO <sub>x</sub> <sup>-</sup> (SeO <sub>3</sub> <sup>-</sup> & SeO <sub>4</sub> <sup>2-</sup> ) (NiS <sub>x</sub> layer) | Se_NiFe LDH/NF                                                              | 50 h@10 mA cm <sup>-2</sup><br>(two-electrode system)       | 1 M KOH + 0.5 M NaCl                                      | <i>Mater. Today Energy</i> <b>19</b> , 100575 (2021)       |
| Al(OH) <sub>n</sub> <sup>-</sup> (CoFeAl LDH)                                                                            | CoFeAl LDH/NF                                                               | 500 h@1000 mA cm <sup>-2</sup><br>(three-electrode system)  | 20wt.% NaOH + satu. NaCl                                  | <i>Nat. Commun.</i> <b>15</b> , 4712 (2024)                |
| Fe(CN) <sub>6</sub> <sup>3-</sup> (NiFePBA)                                                                              | NiFePBA/Ni(OH) <sub>2</sub> /NF                                             | 1000 h@1000 mA cm <sup>-2</sup><br>(three-electrode system) | 1 M KOH + seawater                                        | <i>Nano Today</i> <b>58</b> , 102454 (2024)                |
| WO <sub>4</sub> <sup>2-</sup> (WO <sub>4</sub> <sup>2-</sup> -intercalated NiFe LDH)                                     | WO <sub>4</sub> <sup>2-</sup> -NiFe LDH/NF                                  | 350 h@1000 mA cm <sup>-2</sup><br>(three-electrode system)  | 1 M KOH + seawater                                        | <i>Small</i> <b>20</b> , 2311431 (2024)                    |

**Supplementary Table 4.** Elements contents of  $\text{PF}_6^-$ -intercalated NiFe LDH determined by ICP-MS.

| Element | wt. % | Atomic% |
|---------|-------|---------|
| Ni      | 56.73 | 34.65   |
| Fe      | 17.93 | 11.51   |
| O       | 19.40 | 43.46   |
| F       | 4.81  | 9.08    |
| P       | 1.12  | 1.3     |

**Supplementary Table 5.** Comparison of the overpotentials of CoFe LDH/NF anode in  $\text{PF}_6^-$ -containing seawater with recently reported CoFe-based anodes.

| Anodes                                                    | Electrolyte                                | $j$ (mA $\text{cm}^{-2}$ ) | Overpotential (mV) | Reference                                       |
|-----------------------------------------------------------|--------------------------------------------|----------------------------|--------------------|-------------------------------------------------|
| CoFe LDH/NF (with $\text{KPF}_6$ as electrolyte additive) | 1 M KOH + seawater + 20 mM $\text{PF}_6^-$ | 200                        | 230                | This work                                       |
|                                                           |                                            | 500                        | 307                |                                                 |
|                                                           |                                            | 1000                       | 373                |                                                 |
| CF@CF-phy/NF                                              | 1 M KOH + seawater                         | 500                        | 330                | <i>ACS Nano</i> <b>19</b> , 1530–1546 (2025)    |
| CoFeAl LDH/NF                                             | 20wt.% NaOH + satu. NaCl                   | 10                         | 256                | <i>Nat. Commun.</i> <b>15</b> , 4712 (2024)     |
|                                                           |                                            | 200                        | ~320               |                                                 |
| CoFe-Ci@GQD                                               | 1 M KOH + 0.5 M NaCl                       | 100                        | 255                | <i>Nat. Sustain.</i> <b>7</b> , 158–167 (2024)  |
| Ir/CoFe LDH                                               | 6 M NaOH + 2.8 M NaCl                      | 10                         | 202                | <i>Nat. Commun.</i> <b>15</b> 1973 (2024)       |
| Cr-CoFe LDH/NF                                            | 1 M KOH + seawater                         | 500                        | 334                | <i>Small</i> <b>20</b> , 2307294 (2024)         |
| B- $\text{Co}_2\text{Fe}$ LDH/NF                          | 1 M KOH + seawater                         | 100                        | 310                | <i>Nano Energy</i> <b>83</b> , 105838 (2021)    |
|                                                           |                                            | 500                        | 376                |                                                 |
| $\text{CoCO}_3/\text{CoFe}$ LDH/NF                        | 1 M KOH + seawater                         | 500                        | 316                | <i>Small</i> <b>21</b> , 2409627 (2025)         |
| RuCo- $\text{CoFe}_2\text{O}_4$ @IF                       | 1 M KOH + seawater                         | 1000                       | 425                | <i>Chem. Eng. J.</i> <b>503</b> , 158346 (2025) |

**Supplementary Table 6.** Comparison of the stability of CoFe LDH/NF anode in PF<sub>6</sub><sup>-</sup> containing seawater with recently reported CoFe-based anodes.

| Anodes                                                      | Electrolyte                                             | $j$ (mA cm <sup>-2</sup> ) | Stability (h) | Reference                                                  |
|-------------------------------------------------------------|---------------------------------------------------------|----------------------------|---------------|------------------------------------------------------------|
| CoFe LDH/NF (with KPF <sub>6</sub> as electrolyte additive) | 1 M KOH + seawater + 20 mM PF <sub>6</sub> <sup>-</sup> | 2000                       | 1200          | This work                                                  |
| CF@CF-phy/NF                                                | 1 M KOH + seawater                                      | 1000                       | 1000          | <i>ACS Nano</i> <b>19</b> , 1530–1546 (2025)               |
| CoFeAl LDH/NF                                               | 20wt.% NaOH + satu. NaCl                                | 1000                       | 500           | <i>Nat. Commun.</i> <b>15</b> , 4712 (2024)                |
|                                                             |                                                         | 2000                       | 350           |                                                            |
| CoFe-Ci@GQD                                                 | 1 M KOH + 0.5 M NaCl                                    | 1250                       | 2800          | <i>Nat. Sustain.</i> <b>7</b> , 158–167 (2024)             |
| Ir/CoFe LDH                                                 | 6 M NaOH + 2.8 M NaCl                                   | 800                        | 1000          | <i>Nat. Commun.</i> <b>15</b> 1973 (2024)                  |
| Cr-CoFe LDH/NF                                              | 1 M KOH + seawater                                      | 500                        | 100           | <i>Small</i> <b>20</b> , 2307294 (2024)                    |
| B-Co <sub>2</sub> Fe LDH/NF                                 | 1 M KOH + seawater                                      | 500                        | 100           | <i>Nano Energy</i> <b>83</b> , 105838 (2021)               |
| CeO <sub>2-x</sub> @CoFe LDH/NF                             | 1 M KOH + 0.5 M NaCl                                    | 50                         | 35            | <i>Inorg. Chem. Front.</i> <b>7</b> , 4461–4468 (2020)     |
| CoCO <sub>3</sub> /CoFe LDH/NF                              | 1 M KOH + seawater                                      | 1000                       | 1000          | <i>Small</i> <b>21</b> , 2409627 (2025)                    |
| CoFePBA/Co <sub>2</sub> P                                   | 20wt.% NaOH + satu. NaCl                                | 1000                       | 1000          | <i>Angew. Chem. Int. Ed.</i> <b>62</b> , e202309882 (2023) |
|                                                             |                                                         | 2000                       | 100           |                                                            |
| CoFe-Ni <sub>2</sub> P/NF                                   | 1 M KOH + seawater                                      | 500                        | 500           | <i>Adv. Energy Mater.</i> <b>13</b> , 2301475 (2023)       |
| FCDs/FeCoSe-VSe/NF                                          | 1 M KOH + seawater                                      | 200                        | 200           | <i>Appl. Surf. Sci.</i> <b>680</b> , 161456 (2025)         |
| RuCo-CoFe <sub>2</sub> O <sub>4</sub> @IF                   | 1 M KOH + seawater                                      | 1000                       | 150           | <i>Chem. Eng. J.</i> <b>503</b> , 158346 (2025)            |

**Supplementary Table 7.** Comparison of the extended electrolysis stability achieved by the PF<sub>6</sub><sup>-</sup>-boosted ASO strategy with existing Cl<sup>-</sup>-repelling strategy (surface chloride immobilization/electrostatic repulsion/physical shielding).

| Strategy                                                                                                        | Anode                                                   | Durability@j                                                       | Electrolyte                                                    | Ref.                                                            |
|-----------------------------------------------------------------------------------------------------------------|---------------------------------------------------------|--------------------------------------------------------------------|----------------------------------------------------------------|-----------------------------------------------------------------|
| electrostatic repulsion                                                                                         | NiFe LDH/NF                                             | 5000 h@1000 mA cm <sup>-2</sup><br>2300 h@2000 mA cm <sup>-2</sup> | 1 M KOH + seawater<br>+ 20 mM PF <sub>6</sub> <sup>-</sup>     | This work                                                       |
| surface chloride immobilization (AgCl)                                                                          | NiFe LDH@Ag/NF                                          | 5000 h@400 mA cm <sup>-2</sup>                                     | 6 M KOH + Seawater                                             | <i>Adv. Mater.</i> <b>36</b> , 2306062 (2024)                   |
| surface chloride immobilization (IrCl)                                                                          | Ir/CoFe LDH                                             | 1000 h@800 mA cm <sup>-2</sup>                                     | 6 M NaOH + 2.8 M NaCl                                          | <i>Nat. Commun.</i> <b>15</b> , 1973 (2024)                     |
| surface chloride immobilization & electrostatic repulsion (MoO <sub>4</sub> <sup>2-</sup> & O <sub>s</sub> -Cl) | Os-Ni <sub>4</sub> Mo/MoO <sub>2</sub> /NF              | 2500 h@500 mA cm <sup>-2</sup>                                     | 1 M KOH + seawater                                             | <i>Adv. Mater.</i> <b>36</b> , 2408982 (2024)                   |
| electrostatic repulsion (PO <sub>4</sub> <sup>3-</sup> )                                                        | PO <sub>4</sub> <sup>3-</sup> -intercalated NiFe LDH/NF | 1000 h@1000 mA cm <sup>-2</sup>                                    | 6 M KOH + Seawater                                             | <i>Nat. Commun.</i> <b>15</b> , 10351 (2024)                    |
| electrostatic repulsion (SO <sub>4</sub> <sup>2-</sup> )                                                        | NiFe/NiS <sub>x</sub> /NF                               | 1000 h@400 mA cm <sup>-2</sup>                                     | 6 M KOH + 1.5 M NaCl                                           | <i>Proc. Natl. Acad. Sci. U. S. A.</i> <b>116</b> , 6624 (2019) |
| electrostatic repulsion (SO <sub>4</sub> <sup>2-</sup> )                                                        | Pt/NiFe LDH/NF                                          | 1000 h@400 mA cm <sup>-2</sup>                                     | 1 M NaOH + 0.5 M NaCl + 0.05 M Na <sub>2</sub> SO <sub>4</sub> | <i>Angew. Chem. Int. Ed.</i> <b>60</b> , 22740–22744 (2021)     |
| electrostatic repulsion (SO <sub>4</sub> <sup>2-</sup> immobilization through Ba <sup>2+</sup> )                | NiFeBa LDH/Ni mesh                                      | 10000 h@400 mA cm <sup>-2</sup>                                    | (1 M NaOH + seawater + 0.05 M Na <sub>2</sub> SO <sub>4</sub>  | <i>Adv. Mater.</i> <b>36</b> , 2411302 (2024)                   |
| electrostatic repulsion (CO <sub>3</sub> <sup>2-</sup> & GQDs)                                                  | CoFe-C <sub>i</sub> @GQDs/NF                            | 2800 h@1250 mA cm <sup>-2</sup>                                    | 1 M KOH + 0.5 M NaCl                                           | <i>Nat. Sustain.</i> <b>7</b> , 158–167 (2024)                  |
| physical shielding (MnO <sub>x</sub> )                                                                          | MnO <sub>x</sub> /NiFe LDH/NF                           | 72 h@50 mA cm <sup>-2</sup>                                        | 1 M KOH + seawater                                             | <i>Inorg. Chem.</i> <b>61</b> , 15256 (2021)                    |
| physical shielding (CeO <sub>2</sub> )                                                                          | CeO <sub>2</sub> -NiFe LDH/NF                           | 500 h@1000 mA cm <sup>-2</sup>                                     | 1 M KOH + seawater                                             | <i>J. Energy. Chem.</i> <b>91</b> , 306 (2024)                  |
| physical shielding (MoO <sub>3</sub> )                                                                          | MoO <sub>3</sub> @CoO/CC                                | 350 h@1000 mA cm <sup>-2</sup>                                     | 1 M KOH + seawater                                             | <i>Small</i> <b>20</b> , 2311431 (2024)                         |

**Supplementary Table 8.** Comparison of cell voltage and tolerance of NiFe LDH/NF||Pt/C/NF with reported two-electrode electrolyzers.

| Anode  cathode                                                                 | Tolerance@j                     | Tolerance@cell voltage | Electrolyte                                                  | Ref.                                                       |
|--------------------------------------------------------------------------------|---------------------------------|------------------------|--------------------------------------------------------------|------------------------------------------------------------|
| NiFe LDH/NF  Pt/C/NF                                                           | 1000 h@1000 mA cm <sup>-2</sup> | 1000 h@2.02 V          | 6 M KOH + seawater + 20 mM PF <sub>6</sub> <sup>-</sup>      | This work                                                  |
| NiFe LDH/NF  Pt/NF                                                             | 1000 h@400 mA cm <sup>-2</sup>  | 1000 h@~2.2 V          | 6 M NaOH + seawater + 0.23 M Na <sub>2</sub> SO <sub>4</sub> | <i>Angew. Chem. Int. Ed.</i> <b>133</b> , 22922 (2021)     |
| Ce-NiFe LDH/NF  Pt/C/NF                                                        | 120 h@300 mA cm <sup>-2</sup>   | 120 h@~2.24 V          | 1 M KOH + seawater                                           | <i>J. Energy. Chem.</i> <b>91</b> , 306 (2024)             |
| NiFeBa LDH/Ni mesh  Raney Ni                                                   | 100 h@400 mA cm <sup>-2</sup>   | 100 h@~1.98 V          | 6 M NaOH + seawater + 0.23 M Na <sub>2</sub> SO <sub>4</sub> | <i>Adv. Mater.</i> <b>36</b> , 2411302 (2024)              |
| (NiFe)C <sub>2</sub> O <sub>4</sub> /NF  Pt/C/NF                               | 150 h@500 mA cm <sup>-2</sup>   | 150 h@~2.4 V           | 1 M KOH + seawater                                           | <i>Angew. Chem. Int. Ed.</i> <b>63</b> , e202316522 (2024) |
| CoFeAl LDH/NF  NF                                                              | 500 h@1000 mA cm <sup>-2</sup>  | 500 h@~2.06 V          | 20wt.% NaOH + satu. NaCl                                     | <i>Nat. Commun.</i> <b>15</b> , 4712 (2024)                |
| NiFePBA/Ni(OH) <sub>2</sub> /NF  Pt/C/NF                                       | 500 h@500 mA cm <sup>-2</sup>   | 500 h@~2.23 V          | 1 M KOH + seawater                                           | <i>Nano Today</i> <b>58</b> , 102454 (2024)                |
| Os-Ni <sub>4</sub> Mo/MoO <sub>2</sub> /NF (+, -)                              | 200 h@200 mA cm <sup>-2</sup>   | 200 h@~2.3 V           | 1 M KOH + seawater                                           | <i>Adv. Mater.</i> <b>36</b> , 2408982 (2024)              |
| PO <sub>4</sub> <sup>3-</sup> -intercalated NiFe LDH/NF  Raney Ni              | 200 h@500 mA cm <sup>-2</sup>   | 200 h@~2.08 V          | 6 M KOH + seawater                                           | <i>Nat. Commun.</i> <b>15</b> , 10351 (2024)               |
| CoFe-Ci@GQDs/NF (+, -)                                                         | 200 h@442 mA cm <sup>-2</sup>   | 200 h@~2.71 V          | 1 M KOH with 0.5 M NaCl                                      | <i>Nat. Sustain.</i> <b>7</b> , 158–167 (2024)             |
| NiFe LDH@Ag/NF  Cu <sub>2</sub> S@Ni                                           | 1200 h@400 mA cm <sup>-2</sup>  | 200 h@~1.98 V          | 1 M KOH + seawater                                           | <i>Adv. Mater.</i> <b>36</b> , 2306062 (2024)              |
| MoO <sub>3</sub> @CoO/CC (+, -)                                                | 500 h@1000 mA cm <sup>-2</sup>  | 500 h@~1.93 V          | 1 M KOH + seawater                                           | <i>Nat. Commun.</i> <b>15</b> , 2481 (2024)                |
| Ni <sub>3</sub> FeN@PO <sub>4</sub> <sup>3-</sup> /NF  Pt-Ni@NiMoN/NF          | 140 h@1000 mA cm <sup>-2</sup>  | 140 h@~2.07 V          | 1 M KOH + seawater                                           | <i>Adv. Mater.</i> <b>37</b> , 2415421 (2024)              |
| P <sub>3</sub> O <sub>10</sub> <sup>5-</sup> -Ni(OH) <sub>2</sub> /NF  Pt/C/NF | 240 h@1400 mA cm <sup>-2</sup>  | 240 h@~2.2V            | 1 M KOH + seawater                                           | <i>Adv. Energy Mater.</i> <b>15</b> , 2402883 (2025)       |
